# Supplementary material for: Functional Roles of FgLaeA in Controlling Secondary Metabolism, Sexual Development, and Virulence in Fusarium graminearum
Source: PLoS One. 2013 Jul 16;8(7):e68441. doi: 10.1371/journal.pone.0068441 (PMC3713025; doi:10.1371/journal.pone.0068441)
Supplement: Table S2 — Genes down-regulated in the Δ FgLaeA strain grown in agmatine-amended liquid medium for 60 h. (XLSX) [file pone.0068441.s009.xlsx]

## Sheet: Sheet1
Table S2. Genes down regulated in the DFgLaeA strain grown in agmatine-amended liquid medium for 60 hours
		WTa		DFgLaeAb		Normalized data(RPKM)		Log2 fold	Gene description	TFc	DEGd in DFgVelB		CDDe search
Gene locus	Length	Reads	Coverage	Reads	Coverage	WT	DFgLaeA				down	up
FGSG_00023	792	37	3.68	6	0.55	0.884744	0.134601	-2.71657	member of TFCf 1				#N/A
FGSG_00067	1563	4	0.17	2	0.09	0.0484666	0.0227349	-1.09208	member of TFC 4				#N/A
FGSG_00071	1539	746	46.89	58	3.64	9.17998	0.669595	-3.77713	member of TFC 4		overlapped		gnl|CDD|63955 pfam00067, p450, Cytochrome P450. Cytochrome P450s are haem-thiolate proteins involved in the oxidative degradation of various compounds. They are particularly well known for their role in the degradation of environmental toxins and mutagens. They can be divided into 4 classes, according to the method by which electrons from NAD(P)H are delivered to the catalytic site. Sequence cons…
FGSG_00085	1473	10	0.17	4	0.07	0.12857	0.0482481	-1.41401	hypothetical protein			overlapped	#N/A
FGSG_00118	1464	225	14.66	91	5.92	2.9106	1.10439	-1.39807	hypothetical protein				#N/A
FGSG_00126	2469	889	35.02	142	5.56	6.81902	1.02186	-2.73837	hypothetical protein			overlapped	gnl|CDD|47946 smart00672, CAP10, Putative lipopolysaccharide-modifying enzyme
FGSG_00171	486	338	63.14	92	17.37	13.1711	3.36337	-1.9694	hypothetical protein				gnl|CDD|67700 pfam04094, DUF390, Protein of unknown function (DUF390). This family of long proteins are currently only found in the rice genome. They have no known function. However they may be some kind of transposable element
FGSG_00174	579	2677	441.69	1089	180.64	87.5611	33.4174	-1.38969	hypothetical protein				#N/A
FGSG_00201	1197	202	16.34	96	7.78	3.19594	1.42495	-1.16533	hypothetical protein				#N/A
FGSG_00232	720	12	0.89	4	0.44	0.315639	0.0987075	-1.67704	hypothetical protein				NA
FGSG_00245	543	2	0.21	1	0.12	0.0697544	0.0327207	-1.09208	hypothetical protein				#N/A
FGSG_00252	1023	10	0.85	2	0.11	0.185125	0.0347358	-2.41401	hypothetical protein				NA
FGSG_00312	921	28	2.79	14	1.34	0.575758	0.270079	-1.09208	hypothetical protein				#N/A
FGSG_00326	2610	4	0.06	2	0.05	0.0290242	0.0136148	-1.09208	hypothetical protein		overlapped		#N/A
FGSG_00347	1161	63	5.07	33	2.68	1.02766	0.505015	-1.02496	hypothetical protein				#N/A
FGSG_00384	687	25	2.77	10	0.95	0.689167	0.258622	-1.41401	hypothetical protein				NA
FGSG_00431	1866	12	0.48	2	0.09	0.12179	0.0190433	-2.67704	hypothetical protein				gnl|CDD|68675 pfam05110, AF-4, AF-4 proto-oncoprotein. This family consists of AF4 (Proto-oncogene AF4) and FMR2 (Fragile X E mental retardation syndrome) nuclear proteins. These proteins have been linked to human diseases such as acute lymphoblastic leukaemia and mental retardation. The family also contains a Drosophila AF4 protein homologue Lilliputian which contains an AT-hook domain. Lilliput…
FGSG_00432	324	3	0.71	1	0.22	0.175355	0.0548375	-1.67704	hypothetical protein				NA
FGSG_00453	639	633	94.52	335	50.2	18.7605	9.31466	-1.01012	member of TFC5		overlapped		#N/A
FGSG_00473	471	119	23.53	57	11.04	4.78484	2.15019	-1.15401	hypothetical protein				NA
FGSG_00539	1830	28	1.31	5	0.23	0.289767	0.0485447	-2.57751	siderophore iron transporter mirB				gnl|CDD|71131 pfam07690, MFS_1, Major Facilitator Superfamily
FGSG_00657	837	155	16.32	0	0	3.5071	0	NA	FgLaeA
FGSG_00770	333	4	0.77	2	0.41	0.227487	0.106711	-1.09208	hypothetical protein		overlapped		gnl|CDD|68656 pfam05091, eIF-3_zeta, Eukaryotic translation initiation factor 3 subunit 7 (eIF-3). This family is made up of eukaryotic translation initiation factor 3 subunit 7 (eIF-3 zeta/eIF3 p66/eIF3d). Eukaryotic initiation factor 3 is a multi-subunit complex that is required for binding of mRNA to 40 S ribosomal subunits, stabilisation of ternary complex binding to 40 S subunits, and dissoc…
FGSG_00773	573	1170	190.07	84	13.61	38.6699	2.60464	-3.89205	hypothetical protein				gnl|CDD|67748 pfam04145, Ctr, Ctr copper transporter family. The redox active metal copper is an essential cofactor in critical biological processes such as respiration, iron transport, oxidative stress protection, hormone production, and pigmentation. A widely conserved family of high-affinity copper transport proteins (Ctr proteins) mediates copper uptake at the plasma membrane. A series of clu…
FGSG_00793	669	1839	261.66	230	29.48	52.0591	6.10836	-3.09129	hypothetical protein				gnl|CDD|68674 pfam05109, Herpes_BLLF1, Herpes virus major outer envelope glycoprotein (BLLF1). This family consists of the BLLF1 viral late glycoprotein, also termed gp350/220. It is the most abundantly expressed glycoprotein in the viral envelope of the Herpesviruses and is the major antigen responsible for stimulating the production of neutralising antibodies in vivo
FGSG_01145	546	53	9.11	25	4.18	1.83833	0.813524	-1.17614	hypothetical protein				gnl|CDD|33586 COG3791, COG3791, Uncharacterized conserved protein [Function unknown]
FGSG_01268	441	169	36.12	80	17.27	7.25754	3.2231	-1.17103	hypothetical protein		overlapped		gnl|CDD|71131 pfam07690, MFS_1, Major Facilitator Superfamily
FGSG_01269	552	4	0.55	2	0.34	0.137234	0.0643745	-1.09208	hypothetical protein		overlapped		NA
FGSG_01302	1593	4	0.18	2	0.1	0.0475538	0.0223068	-1.09208	hypothetical protein				gnl|CDD|71131 pfam07690, MFS_1, Major Facilitator Superfamily
FGSG_01460	321	27	7.45	9	2.6	1.59294	0.49815	-1.67704	hypothetical protein				gnl|CDD|66806 pfam03154, Atrophin-1, Atrophin-1 family. Atrophin-1 is the protein product of the dentatorubral-pallidoluysian atrophy (DRPLA) gene. DRPLA OMIM:125370 is a progressive neurodegenerative disorder. It is caused by the expansion of a CAG repeat in the DRPLA gene on chromosome 12p. This results in an extended polyglutamine region in atrophin-1, that is thought to confer toxicity to the…
FGSG_01496	1665	1513	88.23	802	46.68	17.2094	8.55821	-1.00782	hypothetical protein				gnl|CDD|32933 COG3119, AslA, Arylsulfatase A and related enzymes [Inorganic ion transport and metabolism]
FGSG_01529	534	51	9.01	27	4.57	1.80872	0.89835	-1.00962	hypothetical protein		overlapped		gnl|CDD|71233 pfam07793, DUF1631, Protein of unknown function (DUF1631). The members of this family are sequences derived from a group of hypothetical proteins expressed by certain bacterial species. The region concerned is approximately 440 amino acid residues in length
FGSG_01565	447	7	1.07	1	0.19	0.296573	0.039748	-2.89943	hypothetical protein				NA
FGSG_01571	2256	1650	71.37	606	26.17	13.8512	4.77261	-1.53716	hypothetical protein				gnl|CDD|71298 pfam07859, Abhydrolase_3, alpha/beta hydrolase fold. This catalytic domain is found in a very wide range of enzymes
FGSG_01580	873	53	5.77	23	2.56	1.14975	0.468098	-1.29644	hypothetical protein				gnl|CDD|31772 COG1584, COG1584, Predicted membrane protein [Function unknown]
FGSG_01583	1554	13	0.75	2	0.1	0.158429	0.0228666	-2.79252	hypothetical protein		overlapped		gnl|CDD|63955 pfam00067, p450, Cytochrome P450. Cytochrome P450s are haem-thiolate proteins involved in the oxidative degradation of various compounds. They are particularly well known for their role in the degradation of environmental toxins and mutagens. They can be divided into 4 classes, according to the method by which electrons from NAD(P)H are delivered to the catalytic site. Sequence cons…
FGSG_01626	801	4	0.42	2	0.18	0.0945734	0.0443629	-1.09208	hypothetical protein				gnl|CDD|68069 pfam04484, DUF566, Family of unknown function (DUF566). Family of related proteins that is plant specific
FGSG_01660	780	199	24.22	51	5.99	4.8317	1.16171	-2.05628	hypothetical protein				gnl|CDD|68069 pfam04484, DUF566, Family of unknown function (DUF566). Family of related proteins that is plant specific
FGSG_01695	396	2779	638.82	1446	334.09	132.903	64.8778	-1.03458	hypothetical protein				gnl|CDD|66653 pfam02993, MCPVI, Minor capsid protein VI. This minor capsid protein may act as a link between the external capsid and the internal DNA-protein core. The C-terminal 11 residues may function as a protease cofactor leading to enzyme activation
FGSG_01766	978	57	5.24	17	1.55	1.10377	0.30884	-1.83751	member of TFC8		overlapped		gnl|CDD|29569 cd01558, D-AAT_like, D-Alanine aminotransferase (D-AAT_like): D-amino acid aminotransferase catalyzes transamination between D-amino acids and their respective alpha-keto acids. It plays a major role in the synthesis of bacterial cell wall components like D-alanine and D-glutamate in addition to other D-amino acids. The enzyme like other members of this superfamily requires PLP as a…
FGSG_01798	729	64	8.09	26	3.21	1.66262	0.633678	-1.39164	member of PKS11		overlapped		gnl|CDD|65750 pfam01987, DUF124, Protein of unknown function DUF124. This prokaryotic protein family has no known function
FGSG_01868	1479	69	4.4	22	1.38	0.883532	0.264288	-1.74117	hypothetical protein				gnl|CDD|63955 pfam00067, p450, Cytochrome P450. Cytochrome P450s are haem-thiolate proteins involved in the oxidative degradation of various compounds. They are particularly well known for their role in the degradation of environmental toxins and mutagens. They can be divided into 4 classes, according to the method by which electrons from NAD(P)H are delivered to the catalytic site. Sequence cons…
FGSG_02035	3291	7427	221.62	3899	116.43	42.7392	21.0498	-1.02175	hypothetical protein		overlapped		gnl|CDD|29261 cd00204, ANK, ankyrin repeats; ankyrin repeats mediate protein-protein interactions in very diverse families of proteins. The number of ANK repeats in a protein can range from 2 to over 20 (ankyrins, for example). ANK repeats may occur in combinations with other types of domains. The structural repeat unit contains two antiparallel helices and a beta-hairpin, repeats are stacked in …
FGSG_02050	498	100	19.58	4	0.76	3.80287	0.14271	-4.73593	hypothetical protein				NA
FGSG_02051	639	6090	904	964	143.03	180.492	26.804	-2.75142	superoxide dismutase		overlapped		gnl|CDD|66653 pfam02993, MCPVI, Minor capsid protein VI. This minor capsid protein may act as a link between the external capsid and the internal DNA-protein core. The C-terminal 11 residues may function as a protease cofactor leading to enzyme activation
FGSG_02064	1590	14	0.75	6	0.23	0.166752	0.0670466	-1.31447	hypothetical protein				gnl|CDD|63971 pfam00083, Sugar_tr, Sugar (and other) transporter
FGSG_02111	1515	43	2.42	16	0.88	0.537523	0.187642	-1.51834	member of TFC10		overlapped		gnl|CDD|63955 pfam00067, p450, Cytochrome P450. Cytochrome P450s are haem-thiolate proteins involved in the oxidative degradation of various compounds. They are particularly well known for their role in the degradation of environmental toxins and mutagens. They can be divided into 4 classes, according to the method by which electrons from NAD(P)H are delivered to the catalytic site. Sequence cons…
FGSG_02116	801	123	14.71	21	2.55	2.90813	0.465811	-2.64228	member of TFC10		overlapped		gnl|CDD|64543 pfam00685, Sulfotransfer_1, Sulfotransferase domain
FGSG_02135	978	85	8.29	19	1.8	1.64597	0.345174	-2.25354	hypothetical protein		overlapped		NA
FGSG_02147	1278	4	0.15	1	0.03	0.0592749	0.0139025	-2.09208	member of TFC11		overlapped		gnl|CDD|32693 COG2866, COG2866, Predicted carboxypeptidase [Amino acid transport and metabolism]
FGSG_02148	852	1737	197.75	835	94.82	38.6102	17.4128	-1.14883	member of TFC11				NA
FGSG_02149	696	106	14.01	41	5.47	2.88428	1.04664	-1.46245	member of TFC11				gnl|CDD|64038 pfam00153, Mito_carr, Mitochondrial carrier protein
FGSG_02155	1374	11	0.68	4	0.25	0.151617	0.0517245	-1.55151	member of TFC11				gnl|CDD|48014 smart00747, CFEM, eight cysteine-containing domain present in fungal extracellular membrane proteins
FGSG_02165	996	450	43.91	200	19.63	8.55647	3.56774	-1.262	hypothetical protein				gnl|CDD|31264 COG1064, AdhP, Zn-dependent alcohol dehydrogenases [General function prediction only]
FGSG_02218	1041	21	1.56	5	0.35	0.382041	0.0853379	-2.16247	hypothetical protein				gnl|CDD|71298 pfam07859, Abhydrolase_3, alpha/beta hydrolase fold. This catalytic domain is found in a very wide range of enzymes
FGSG_02249	606	52	8.08	15	2.43	1.62507	0.439786	-1.88563	hypothetical protein				gnl|CDD|68280 pfam04702, Vicilin_N, Vicilin N terminal region. This region is found in plant seed storage proteins, N-terminal to the Cupin domain (pfam00190). In Macadamia integrifolia, this region is processed into peptides of approximately 50 amino acids containing a C-X-X-X-C-(10-12)X-C-X-X-X-C motif. These peptides exhibit antimicrobial activity in vitro
FGSG_02288	5673	1275	21.88	384	6.57	4.25636	1.20266	-1.8234	hypothetical protein	TF	overlapped		gnl|CDD|31309 COG1112, COG1112, Superfamily I DNA and RNA helicases and helicase subunits [DNA replication, recombination, and repair]
FGSG_02290	1788	148	7.71	76	3.97	1.5676	0.755212	-1.0536	hypothetical protein				gnl|CDD|29261 cd00204, ANK, ankyrin repeats; ankyrin repeats mediate protein-protein interactions in very diverse families of proteins. The number of ANK repeats in a protein can range from 2 to over 20 (ankyrins, for example). ANK repeats may occur in combinations with other types of domains. The structural repeat unit contains two antiparallel helices and a beta-hairpin, repeats are stacked in …
FGSG_02309	456	106	22.34	22	4.68	4.40233	0.857197	-2.36057	hypothetical protein				gnl|CDD|29578 cd02650, nuc_hydro_CaPnhB, NH_hydro_CaPnhB: A subgroup of nucleoside hydrolases similar to Corynebacterium ammoniagenes Purine/pyrimidine nucleoside hydrolase (pnhB). Nucleoside hydrolases cleave the N-glycosidic bond in nucleosides generating ribose and the respective base. These enzymes vary in their substrate specificity
FGSG_02319	609	484	74.36	249	38.79	15.0511	7.26449	-1.05094	member of PKS12 cluster for aurofusarin		overlapped		gnl|CDD|32098 COG1914, MntH, Mn2+ and Fe2+ transporters of the NRAMP family [Inorganic ion transport and metabolism]
FGSG_02330	1809	617	33.43	295	16.01	6.45934	2.89739	-1.15663	member of PKS12 cluster				gnl|CDD|32315 COG2132, SufI, Putative multicopper oxidases [Secondary metabolites biosynthesis, transport, and catabolism]
FGSG_02333	978	83	7.7	43	4.17	1.60724	0.781182	-1.04085	member of PKS12 cluster		overlapped		gnl|CDD|68038 pfam04449, Fimbrial_CS1, CS1 type fimbrial major subunit. Fimbriae, also known as pili, form filaments radiating from the surface of the bacterium to a length of 0.5-1.5 micrometres. They enable the cell to colonise host epithelia. This family constitutes the major subunits of CS1 like pili, including CS2 and CFA1 from Escherichia coli, and also the Cable type II pilin major subunit…
FGSG_02339	1650	3372	200.01	1206	71.4	38.703	12.9863	-1.57545	hypothetical protein				gnl|CDD|31808 COG1621, SacC, Beta-fructosidases (levanase/invertase) [Carbohydrate transport and metabolism]
FGSG_02342	681	69	9.45	11	1.51	1.91886	0.286991	-2.74117	cutinase precursor				gnl|CDD|33727 COG3946, VirJ, Type IV secretory pathway, VirJ component [Intracellular trafficking and secretion]
FGSG_02537	342	10	1.91	5	0.93	0.553752	0.259757	-1.09208	hypothetical protein				NA
FGSG_02685	444	133	26.86	67	13.75	5.67296	2.68111	-1.08127	member of TFC17				gnl|CDD|64692 pfam00841, Protamine_P2, Sperm histone P2. This protein also known as protamine P2 can substitute for histones in the chromatin of sperm. The alignment contains both the sequence of the mature P2 protein and its propeptide
FGSG_02800	3456	37	0.87	15	0.31	0.202754	0.0771153	-1.39464	hypothetical protein		overlapped		gnl|CDD|31309 COG1112, COG1112, Superfamily I DNA and RNA helicases and helicase subunits [DNA replication, recombination, and repair]
FGSG_02871	438	3307	703.75	1033	218.47	142.989	41.9034	-1.77076	member of TFC48		overlapped		gnl|CDD|68948 pfam05397, GAL11, Transcription regulatory protein GAL11. This family contains yeast GAL11 proteins. Gal11 and Sin4 proteins are yeast global transcription factors that regulate transcription of a variety of genes, both positively and negatively. Gal11, in a major part, functions in the activation of transcription, whereas Sin4 has an opposite role, yet they are reported to be prese…
FGSG_02887	924	83	8.42	18	1.86	1.70117	0.346117	-2.29719	hypothetical protein				gnl|CDD|64543 pfam00685, Sulfotransfer_1, Sulfotransferase domain
FGSG_02890	684	4	0.33	1	0.1	0.11075	0.0259757	-2.09208	cutinase-1 precursor				NA
FGSG_02915	366	8	1.57	4	0.69	0.413952	0.194179	-1.09208	hypothetical protein				gnl|CDD|67880 pfam04284, DUF441, Protein of unknown function (DUF441). Predicted to be an integral membrane protein
FGSG_02957	390	41	9.48	21	4.99	1.99095	0.956704	-1.05731	hypothetical protein				NA
FGSG_03020	1848	46	2.26	21	1.04	0.471408	0.201902	-1.22332	hypothetical protein			overlapped	gnl|CDD|64803 pfam00955, HCO3_cotransp, HCO3- transporter family. This family contains Band 3 anion exchange proteins that exchange CL-/HCO3-. This family also includes cotransporters of Na+/HCO3-
FGSG_03035	450	3298	701.13	1303	277.32	138.797	51.4464	-1.43183	hypothetical protein				gnl|CDD|66895 pfam03251, Tymo_45kd_70kd, Tymovirus 45/70Kd protein. Tymoviruses are single stranded RNA viruses. This family includes a protein of unknown function that has been named based on its molecular weight. Tymoviruses such as the ononis yellow mosaic tymovirus encode only three proteins. Of these two are overlapping this protein overlaps a larger ORF that is thought to be the polymerase
FGSG_03036	816	1413	164.96	649	75.66	32.7939	14.1311	-1.21455	hypothetical protein			overlapped	gnl|CDD|31231 COG1028, FabG, Dehydrogenases with different specificities (related to short-chain alcohol dehydrogenases) [Secondary metabolites biosynthesis, transport, and catabolism / General function prediction only]
FGSG_03094	798	159	19.33	49	5.96	3.77342	1.09098	-1.79025	hypothetical protein				gnl|CDD|31231 COG1028, FabG, Dehydrogenases with different specificities (related to short-chain alcohol dehydrogenases) [Secondary metabolites biosynthesis, transport, and catabolism / General function prediction only]
FGSG_03129	777	42	4.86	12	1.28	1.02369	0.274399	-1.89943	hypothetical protein				gnl|CDD|58500 cd01823, SEST_like, SEST_like. A family of secreted SGNH-hydrolases similar to Streptomyces scabies esterase (SEST), a causal agent of the potato scab disease, which hydrolyzes a specific ester bond in suberin, a plant lipid. The tertiary fold of this enzyme is substantially different from that of the alpha/beta hydrolase family and unique among all known hydrolases; its active site…
FGSG_03153	7644	14	0.13	7	0.06	0.0346856	0.0162705	-1.09208	hypothetical protein				gnl|CDD|31933 COG1747, COG1747, Uncharacterized N-terminal domain of the transcription elongation factor GreA [Function unknown]
FGSG_03157	408	301	69.1	45	10.51	13.9716	1.95964	-2.83385	hypothetical protein			overlapped	gnl|CDD|65308 pfam01500, Keratin_B2, Keratin, high sulfur B2 protein. High sulfur proteins are cysteine-rich proteins synthesised during the differentiation of hair matrix cells, and form hair fibres in association with hair keratin intermediate filaments. This family has been divided up into four regions, with the second region containing 8 copies of a short repeat. This family is also known as …
FGSG_03172	1818	78	3.9	19	0.95	0.812535	0.185687	-2.12955	hypothetical protein				gnl|CDD|65198 pfam01384, PHO4, Phosphate transporter family. This family includes PHO-4 from Neurospora crassa which is a is a Na(+)-phosphate symporter. This family also contains the leukaemia virus receptor
FGSG_03184	786	185	22.52	43	5.1	4.45749	0.972006	-2.1972	hypothetical protein		overlapped		gnl|CDD|70008 pfam06519, TolA, TolA protein. This family consists of several bacterial TolA proteins as well as two eukaryotic proteins of unknown function. Tol proteins are involved in the translocation of group A colicins. Colicins are bacterial protein toxins, which are active against Escherichia coli and other related species (See pfam01024). TolA is anchored to the cytoplasmic membrane by a …
FGSG_03194	1140	149	12.8	67	5.64	2.47527	1.04422	-1.24516	polygalacturonase 1 precursor				gnl|CDD|34993 COG5434, PGU1, Endopygalactorunase [Cell envelope biogenesis, outer membrane]
FGSG_03218	765	4269	540.05	1513	191.58	105.683	35.1399	-1.58856	hypothetical protein				gnl|CDD|73342 cd03144, GATase1_ScBLP_like, Type 1 glutamine amidotransferase (GATase1)-like domain found in proteins similar to Saccharomyces cerevisiae biotin-apoprotein ligase (ScBLP). Biotin-apoprotein ligase modifies proteins by covalently attaching biotin. ScBLP is known to biotinylate acety-CoA carboxylase and pyruvate carboxylase. The catalytic triad typical of GATase1 domains is not conse…
FGSG_03236	1071	327	29.69	101	9.01	5.78229	1.67554	-1.78701	hypothetical protein				gnl|CDD|31408 COG1215, COG1215, Glycosyltransferases, probably involved in cell wall biogenesis [Cell envelope biogenesis, outer membrane]
FGSG_03237	1149	208	17.52	104	8.8	3.42835	1.60819	-1.09208	hypothetical protein				gnl|CDD|68069 pfam04484, DUF566, Family of unknown function (DUF566). Family of related proteins that is plant specific
FGSG_03309	1509	236	14.87	122	7.61	2.96186	1.43646	-1.04398	hypothetical protein				gnl|CDD|65372 pfam01565, FAD_binding_4, FAD binding domain. This family consists of various enzymes that use FAD as a co-factor, most of the enzymes are similar to oxygen oxidoreductase. One of the enzymes Vanillyl-alcohol oxidase (VAO) has a solved structure, the alignment includes the FAD binding site, called the PP-loop, between residues 99-110. The FAD molecule is covalently bound in the know…
FGSG_03359	1158	16	1.09	8	0.56	0.261669	0.122745	-1.09208	hypothetical protein				gnl|CDD|70346 pfam06873, SerH, Cell surface immobilisation antigen SerH. This family consists of several cell surface immobilisation antigen SerH proteins which seem to be specific to Tetrahymena thermophila. The SerH locus of Tetrahymena thermophila is one of several paralogous loci with genes encoding variants of the major cell surface protein known as the immobilisation antigen (i-ag)
FGSG_03383	801	27	2.72	9	0.87	0.63837	0.199633	-1.67704	hypothetical protein			overlapped	NA
FGSG_03402	1374	20842	1484.08	10045	715.85	287.272	129.893	-1.14509	hypothetical protein				gnl|CDD|64205 pfam00328, Acid_phosphat_A, Histidine acid phosphatase
FGSG_03471	1065	32	2.74	8	0.61	0.569039	0.133464	-2.09208	hypothetical protein				gnl|CDD|29261 cd00204, ANK, ankyrin repeats; ankyrin repeats mediate protein-protein interactions in very diverse families of proteins. The number of ANK repeats in a protein can range from 2 to over 20 (ankyrins, for example). ANK repeats may occur in combinations with other types of domains. The structural repeat unit contains two antiparallel helices and a beta-hairpin, repeats are stacked in …
FGSG_03511	1152	215	18.26	75	6.32	3.53449	1.15673	-1.61145	hypothetical protein				gnl|CDD|70450 pfam06985, HET, Heterokaryon incompatibility protein (HET). This family represents a conserved region approximately 150 residues long within various heterokaryon incompatibility proteins that seem to be restricted to ascomycete fungi. Genetic differences in specific het genes prevent a viable heterokaryotic fungal cell from being formed by the fusion of filaments from two different …
FGSG_03514	1395	73	4.71	31	1.97	0.991037	0.39483	-1.32771	hypothetical protein		overlapped		gnl|CDD|30714 COG0365, Acs, Acyl-coenzyme A synthetases/AMP-(fatty) acid ligases [Lipid metabolism]
FGSG_03518	2145	2989	136.72	424	19.41	26.39	3.51206	-2.90961	hypothetical protein				gnl|CDD|66806 pfam03154, Atrophin-1, Atrophin-1 family. Atrophin-1 is the protein product of the dentatorubral-pallidoluysian atrophy (DRPLA) gene. DRPLA OMIM:125370 is a progressive neurodegenerative disorder. It is caused by the expansion of a CAG repeat in the DRPLA gene on chromosome 12p. This results in an extended polyglutamine region in atrophin-1, that is thought to confer toxicity to the…
FGSG_03534	1485	49	2.86	2	0.08	0.624901	0.0239291	-4.70679	Tri3(TFC42)				NA
FGSG_03535	1563	2292	140.43	1042	63.3	27.7713	11.8449	-1.22933	Tri4 (TFC42)				gnl|CDD|63955 pfam00067, p450, Cytochrome P450. Cytochrome P450s are haem-thiolate proteins involved in the oxidative degradation of various compounds. They are particularly well known for their role in the degradation of environmental toxins and mutagens. They can be divided into 4 classes, according to the method by which electrons from NAD(P)H are delivered to the catalytic site. Sequence cons…
FGSG_03536	672	3457	496.72	1886	270.4	97.4252	49.8649	-0.96627	Tri6 (TFC42)	TF		overlapped
FGSG_03537	1128	141	11.79	58	4.72	2.36729	0.91357	-1.37365	Tri5 (TFC42)				gnl|CDD|29483 cd00868, Terpene_cyclase_C1, Terpene cyclases, Class 1 (C1) of the class 1 family of isoprenoid biosynthesis enzymes, which share the 'isoprenoid synthase fold' and convert linear, all-trans, isoprenoids, geranyl (C10)-, farnesyl (C15)-, or geranylgeranyl (C20)-diphosphate into numerous cyclic forms of monoterpenes, diterpenes, and sesquiterpenes. Also included in this CD are the ci…
FGSG_03539	132	59	37.3	17	11.17	8.46485	2.28822	-1.88726	Tri9 (TFC42)			overlapped	NA
FGSG_03540	1479	175	10.87	17	1.09	2.24084	0.204223	-3.45583	Tri11 (TFC42)			overlapped	gnl|CDD|63955 pfam00067, p450, Cytochrome P450. Cytochrome P450s are haem-thiolate proteins involved in the oxidative degradation of various compounds. They are particularly well known for their role in the degradation of environmental toxins and mutagens. They can be divided into 4 classes, according to the method by which electrons from NAD(P)H are delivered to the catalytic site. Sequence cons…
FGSG_03543	1116	710	61.61	248	21.32	12.0486	3.9483	-1.60956	Tri14 (TFC42)				gnl|CDD|32693 COG2866, COG2866, Predicted carboxypeptidase [Amino acid transport and metabolism]
FGSG_03546	855	2512	283.15	1262	142.59	55.641	26.225	-1.0852	hypothetical protein				gnl|CDD|31442 COG1250, FadB, 3-hydroxyacyl-CoA dehydrogenase [Lipid metabolism]
FGSG_03548	1653	691	40.92	336	20	7.91674	3.61151	-1.1323	hypothetical protein				gnl|CDD|63955 pfam00067, p450, Cytochrome P450. Cytochrome P450s are haem-thiolate proteins involved in the oxidative degradation of various compounds. They are particularly well known for their role in the degradation of environmental toxins and mutagens. They can be divided into 4 classes, according to the method by which electrons from NAD(P)H are delivered to the catalytic site. Sequence cons…
FGSG_03550	561	4	0.6	2	0.27	0.135033	0.0633417	-1.09208	hypothetical protein		overlapped		gnl|CDD|68138 pfam04554, Extensin_2, Extensin-like region
FGSG_03585	753	696	88.88	323	40.88	17.5047	7.62132	-1.19963	hypothetical protein			overlapped	gnl|CDD|66806 pfam03154, Atrophin-1, Atrophin-1 family. Atrophin-1 is the protein product of the dentatorubral-pallidoluysian atrophy (DRPLA) gene. DRPLA OMIM:125370 is a progressive neurodegenerative disorder. It is caused by the expansion of a CAG repeat in the DRPLA gene on chromosome 12p. This results in an extended polyglutamine region in atrophin-1, that is thought to confer toxicity to the…
FGSG_03593	1719	327	18.77	162	9.22	3.60258	1.67441	-1.10538	hypothetical protein				gnl|CDD|30625 COG0277, GlcD, FAD/FMN-containing dehydrogenases [Energy production and conversion]
FGSG_03597	1425	2132	146.27	1122	77.02	28.3344	13.9895	-1.01821	hypothetical protein	TF			gnl|CDD|47643 smart00315, RGS, Regulator of G protein signalling domain; RGS family members are GTPase-activating proteins for heterotrimeric G-protein alpha-subunits
FGSG_03600	549	85	14.88	12	2.18	2.93216	0.388358	-2.91651	hypothetical protein				gnl|CDD|64140 pfam00260, Protamine_P1, Protamine P1
FGSG_03607	2481	6	0.2	3	0.09	0.0458	0.0214841	-1.09208	hypothetical protein		overlapped		gnl|CDD|31661 COG1472, BglX, Beta-glucosidase-related glycosidases [Carbohydrate transport and metabolism]
FGSG_03621	555	7	0.86	2	0.22	0.238862	0.0640265	-1.89943	hypothetical protein			overlapped	gnl|CDD|66895 pfam03251, Tymo_45kd_70kd, Tymovirus 45/70Kd protein. Tymoviruses are single stranded RNA viruses. This family includes a protein of unknown function that has been named based on its molecular weight. Tymoviruses such as the ononis yellow mosaic tymovirus encode only three proteins. Of these two are overlapping this protein overlaps a larger ORF that is thought to be the polymerase
FGSG_03632	996	68	6.16	9	0.83	1.29298	0.160548	-3.00962	hypothetical protein				gnl|CDD|67080 pfam03443, Glyco_hydro_61, Glycosyl hydrolase family 61
FGSG_03633	2271	8	0.3	4	0.14	0.0667136	0.0312943	-1.09208	hypothetical protein		overlapped		gnl|CDD|30572 COG0223, Fmt, Methionyl-tRNA formyltransferase [Translation, ribosomal structure and biogenesis]
FGSG_03643	1329	12	0.73	2	0.13	0.171001	0.0267379	-2.67704	hypothetical protein			overlapped	gnl|CDD|67225 pfam03595, C4dic_mal_tran, C4-dicarboxylate transporter/malic acid transport protein
FGSG_03674	675	120	17.2	43	6.18	3.36681	1.13185	-1.5727	hypothetical protein		overlapped		NA
FGSG_03692	1833	4240	225.62	2112	112.35	43.8071	20.4717	-1.09753	hypothetical protein				gnl|CDD|65578 pfam01794, Ferric_reduct, Ferric reductase like transmembrane component. This family includes a common region in the transmembrane proteins mammalian cytochrome B-245 heavy chain (gp91-phox), ferric reductase transmembrane component in yeast and respiratory burst oxidase from mouse-ear cress. This may be a family of flavocytochromes capable of moving electrons across the plasma memb…
FGSG_03700	1599	329	19.76	125	7.6	3.89663	1.38894	-1.48824	member of TFC40		overlapped		gnl|CDD|63955 pfam00067, p450, Cytochrome P450. Cytochrome P450s are haem-thiolate proteins involved in the oxidative degradation of various compounds. They are particularly well known for their role in the degradation of environmental toxins and mutagens. They can be divided into 4 classes, according to the method by which electrons from NAD(P)H are delivered to the catalytic site. Sequence cons…
FGSG_03708	1362	26	1.69	2	0.14	0.361524	0.0260901	-3.79252	hypothetical protein			overlapped	gnl|CDD|65149 pfam01328, Peroxidase_2, Peroxidase, family 2. The peroxidases in this family do not have similarity to other peroxidases
FGSG_03721	903	494	52.32	164	17.58	10.3605	3.22685	-1.68289	hypothetical protein				gnl|CDD|68921 pfam05368, NmrA, NmrA-like family. NmrA is a negative transcriptional regulator involved in the post-translational modification of the transcription factor AreA. NmrA is part of a system controlling nitrogen metabolite repression in fungi. This family only contains a few sequences as iteration results in significant matches to other Rossmann fold families
FGSG_03726	924	20	1.97	6	0.56	0.40992	0.115372	-1.82904	hypothetical protein				gnl|CDD|71131 pfam07690, MFS_1, Major Facilitator Superfamily
FGSG_03737	1752	73	3.48	2	0.09	0.789096	0.0202824	-5.2819	member of NPS6 cluster (TFC39)				gnl|CDD|71131 pfam07690, MFS_1, Major Facilitator Superfamily
FGSG_03762	1299	300	21.66	149	10.55	4.37374	2.03798	-1.10173	hypothetical protein				gnl|CDD|64034 pfam00149, Metallophos, Calcineurin-like phosphoesterase. This family includes a diverse range of phosphoesterases, including protein phosphoserine phosphatases, nucleotidases, sphingomyelin phosphodiesterases and 2'-3' cAMP phosphodiesterases as well as nucleases such as bacterial SbcD or yeast MRE11. The most conserved regions in this superfamily centre around the metal chelating …
FGSG_03782	1434	103	7.03	38	2.52	1.36028	0.470823	-1.53065	hypothetical protein				gnl|CDD|30625 COG0277, GlcD, FAD/FMN-containing dehydrogenases [Energy production and conversion]
FGSG_03787	723	1437	182.61	664	83.84	37.6409	16.3175	-1.20588	hypothetical protein		overlapped		gnl|CDD|71675 pfam08241, Methyltransf_11, Methyltransferase domain. Members of this family are SAM dependent methyltransferases
FGSG_03788	795	131	15.8	40	4.95	3.12065	0.893955	-1.80357	hypothetical protein				gnl|CDD|29534 cd00413, Glyco_hydrolase_16, The O-Glycosyl hydrolases are a widespread group of enzymes that hydrolyse the glycosidic bond between two or more carbohydrates, or between a carbohydrate and a non-carbohydrate moiety. A glycosyl hydrolase classification system based on sequence similarity has led to the definition of more than 95 different families inlcuding glycoside hydrolase family…
FGSG_03790	801	111	12.94	26	2.91	2.62441	0.576718	-2.18605	hypothetical protein				gnl|CDD|58569 cd04268, ZnMc_MMP_like, Zinc-dependent metalloprotease, MMP_like subfamily. This group contains matrix metalloproteinases (MMPs), serralysins, and the astacin_like family of proteases
FGSG_03828	357	10	2.24	4	0.84	0.530485	0.199074	-1.41401	hypothetical protein		overlapped		gnl|CDD|28910 cd00028, B_lectin, Bulb-type mannose-specific lectin. The domain contains a three-fold internal repeat (beta-prism architecture). The consensus sequence motif QXDXNXVXY is involved in alpha-D-mannose recognition. Lectins are carbohydrate-binding proteins which specifically recognize diverse carbohydrates and mediate a wide variety of biological processes, such as cell-cell and host-…
FGSG_03869	1374	76	5.31	38	2.65	1.04753	0.491383	-1.09208	hypothetical protein			overlapped	gnl|CDD|31081 COG0738, FucP, Fucose permease [Carbohydrate transport and metabolism]
FGSG_03871	453	147	29.71	50	10.17	6.14555	1.96108	-1.64789	hypothetical protein				NA
FGSG_03884	1398	173	10.05	81	4.48	2.34358	1.02944	-1.18686	hypothetical protein				gnl|CDD|66609 pfam02948, Amelogenin, Amelogenin. Amelogenins play a role in biomineralisation. They seem to regulate the formation of crystallites during the secretory stage of tooth enamel development. thought to play a major role in the structural organisation and mineralisation of developing enamel. They are found in the extracellular matrix. Mutations in X-chromosomal amelogenin can cause Ame…
FGSG_03898	1614	94	5.5	46	2.65	1.10297	0.506381	-1.12311	hypothetical protein				gnl|CDD|30625 COG0277, GlcD, FAD/FMN-containing dehydrogenases [Energy production and conversion]
FGSG_03922	1638	83	4.87	24	1.37	0.959634	0.260328	-1.88216	hypothetical protein				gnl|CDD|65339 pfam01532, Glyco_hydro_47, Glycosyl hydrolase family 47. Members of this family are alpha-mannosidases that catalyse the hydrolysis of the terminal 1,2-linked alpha-D-mannose residues in the oligo-mannose oligosaccharide Man(9)(GlcNAc)(2)
FGSG_03923	978	36	2.88	17	1.36	0.697116	0.30884	-1.17454	hypothetical protein				gnl|CDD|68921 pfam05368, NmrA, NmrA-like family. NmrA is a negative transcriptional regulator involved in the post-translational modification of the transcription factor AreA. NmrA is part of a system controlling nitrogen metabolite repression in fungi. This family only contains a few sequences as iteration results in significant matches to other Rossmann fold families
FGSG_03932	1095	16	1.23	2	0.12	0.276724	0.0324518	-3.09208	hypothetical protein		overlapped		gnl|CDD|71136 pfam07695, 7TMR-DISM_7TM, 7TM diverse intracellular signalling. This entry represents the transmembrane region of the 7TM-DISM (7TM Receptors with Diverse Intracellular Signalling Modules)
FGSG_03934	1605	102	5.87	7	0.43	1.20356	0.07749	-3.95715	hypothetical protein		overlapped		gnl|CDD|63971 pfam00083, Sugar_tr, Sugar (and other) transporter
FGSG_03963	1716	59	2.8	31	1.48	0.651143	0.320972	-1.02053	member of PKS14 cluster (TFC35)				gnl|CDD|65239 pfam01425, Amidase, Amidase
FGSG_03964	6090	13	0.16	2	0.02	0.0404266	0.00583493	-2.79252	PKS14				gnl|CDD|33130 COG3321, COG3321, Polyketide synthase modules and related proteins [Secondary metabolites biosynthesis, transport, and catabolism]
FGSG_03972	1758	14	0.46	2	0.08	0.150817	0.0202131	-2.89943	member of PKS14 cluster (TFC35)				gnl|CDD|30625 COG0277, GlcD, FAD/FMN-containing dehydrogenases [Energy production and conversion]
FGSG_04019	1845	8	0.38	4	0.19	0.0821174	0.03852	-1.09208	hypothetical protein				NA
FGSG_04049	822	30	3.03	13	1.46	0.691179	0.280992	-1.29853	hypothetical protein				gnl|CDD|64513 pfam00651, BTB, BTB/POZ domain. The BTB (for BR-C, ttk and bab) or POZ (for Pox virus and Zinc finger) domain is present near the N-terminus of a fraction of zinc finger (pfam00096) proteins and in proteins that contain the pfam01344 motif such as Kelch and a family of pox virus proteins. The BTB/POZ domain mediates homomeric dimerisation and in some instances heteromeric dimerisati…
FGSG_04074	573	1515	244.66	786	128.7	50.0725	24.372	-1.0388	hypothetical protein				gnl|CDD|66350 pfam02654, CobS, Cobalamin-5-phosphate synthase. This is family of Colbalmin-5-phosphate synthases, CobS, from bacteria. The CobS enzyme catalyses the synthesis of AdoCbl-5'-p from AdoCbi-GDP and alpha-ribazole-5'-P. This enzyme is involved in the cobalamin (vitamin B12) biosynthesis pathway in particular the nucleotide loop assembly stage in conjunction with CobC, CobU and CobT
FGSG_04089	744	197	25.07	40	5.26	5.01458	0.955234	-2.3922	hypothetical protein		overlapped		gnl|CDD|66895 pfam03251, Tymo_45kd_70kd, Tymovirus 45/70Kd protein. Tymoviruses are single stranded RNA viruses. This family includes a protein of unknown function that has been named based on its molecular weight. Tymoviruses such as the ononis yellow mosaic tymovirus encode only three proteins. Of these two are overlapping this protein overlaps a larger ORF that is thought to be the polymerase
FGSG_04209	771	1676	211.65	717	90.94	41.1681	16.523	-1.31706	hypothetical protein	TF	overlapped		gnl|CDD|32638 COG2808, PaiB, Transcriptional regulator [Transcription]
FGSG_04345	1362	2	0.08	1	0.04	0.0278096	0.0130451	-1.09208	hypothetical protein				gnl|CDD|63915 pfam00026, Asp, Eukaryotic aspartyl protease. Aspartyl (acid) proteases include pepsins, cathepsins, and renins. Two-domain structure, probably arising from ancestral duplication. This family does not include the retroviral nor retrotransposon proteases (pfam00077), which are much smaller and appear to be homologous to a single domain of the eukaryotic asp proteases
FGSG_04432	1317	38	2.68	17	1.18	0.546436	0.229343	-1.25254	hypothetical protein				NA
FGSG_04434	1596	18360	1118.43	8768	532.97	217.862	97.6091	-1.15833	hypothetical protein				gnl|CDD|73190 cd00314, plant_peroxidase, Plant peroxidase superfamily. Along with animal peroxidases, these enzymes belong to a group of heme-dependent peroxidases containing a heme prosthetic group (ferriprotoporphyrin IX), which catalyzes a multistep oxidative reaction involving hydrogen peroxide as the electron acceptor. The plant peroxidase superfamily is comprised of three structurally and f…
FGSG_04563	948	61	5.58	12	1.08	1.2186	0.224903	-2.43785	hypothetical protein				gnl|CDD|69325 pfam05793, TFIIF_alpha, Transcription initiation factor IIF, alpha subunit (TFIIF-alpha). Transcription initiation factor IIF, alpha subunit (TFIIF-alpha) or RNA polymerase II-associating protein 74 (RAP74) is the large subunit of transcription factor IIF (TFIIF), which is essential for accurate initiation and stimulates elongation by RNA polymerase II
FGSG_04591	1107	2	0.05	1	0.02	0.0342156	0.01605	-1.09208	member of PKS15cluster (TFC33)				gnl|CDD|58339 cd00685, Trans_IPPS_HT, Trans-Isoprenyl Diphosphate Synthases (Trans_IPPS), head-to-tail (HT) (1'-4) condensation reactions. This CD includes all-trans (E)-isoprenyl diphosphate synthases which synthesis various chain length (C10, C15, C20, C25, C30, C35, C40, C45, and C50) linear isoprenyl diphosphates from precursors, isopentenyl diphosphate (IPP) and dimethylallyl diphosphate (DM…
FGSG_04621	1464	950	62.65	446	29.77	12.2892	5.41273	-1.18296	hypothetical protein				gnl|CDD|65396 pfam01593, Amino_oxidase, Flavin containing amine oxidoreductase. This family consists of various amine oxidases, including maze polyamine oxidase (PAO) and various flavin containing monoamine oxidases (MAO). The aligned region includes the flavin binding site of these enzymes. The family also contains phytoene dehydrogenases and related enzymes. In vertebrates MAO plays an importan…
FGSG_04628	1665	399	22.45	210	11.83	4.53837	2.24093	-1.01808	hypothetical protein				gnl|CDD|68069 pfam04484, DUF566, Family of unknown function (DUF566). Family of related proteins that is plant specific
FGSG_04654	1041	197	17.69	61	5.53	3.58391	1.04112	-1.78339	hypothetical protein				gnl|CDD|69475 pfam05955, Herpes_gp2, Equine herpesvirus glycoprotein gp2. This family consists of a number of glycoprotein gp2 sequences from equine herpesviruses
FGSG_04655	1026	293	25.67	147	12.81	5.40831	2.54562	-1.08716	hypothetical protein				NA
FGSG_04656	1743	2459	138.62	365	20.61	26.7179	3.72065	-2.84418	hypothetical protein				gnl|CDD|64029 pfam00144, Beta-lactamase, Beta-lactamase. This family appears to be distantly related to pfam00905 and PF00768 D-alanyl-D-alanine carboxypeptidase
FGSG_04677	837	30	3.1	11	1.11	0.678793	0.233502	-1.53954	hypothetical protein				gnl|CDD|64518 pfam00657, Lipase_GDSL, GDSL-like Lipase/Acylhydrolase
FGSG_04693	1209	41	3.24	14	1.04	0.642242	0.205743	-1.64228	hypothetical protein				gnl|CDD|66617 pfam02956, TT_ORF1, TT viral orf 1. TT virus (TTV), isolated initially from a Japanese patient with hepatitis of unknown aetiology, has since been found to infect both healthy and diseased individuals and numerous prevalence studies have raised questions about its role in unexplained hepatitis. ORF1 is a large 750 residue protein
FGSG_04694	7692	8	0.1	1	0.01	0.0196966	0.00230985	-3.09208	PKS2				gnl|CDD|33130 COG3321, COG3321, Polyketide synthase modules and related proteins [Secondary metabolites biosynthesis, transport, and catabolism]
FGSG_04695	747	4	0.39	2	0.2	0.10141	0.0475699	-1.09208	hypothetical protein		overlapped		NA
FGSG_04696	999	4	0.2	2	0.1	0.0758291	0.0355703	-1.09208	hypothetical protein				gnl|CDD|34557 COG4949, COG4949, Uncharacterized membrane-anchored protein conserved in bacteria [Function unknown]
FGSG_04732	1497	466	29.99	151	9.66	5.89529	1.79217	-1.71786	hypothetical protein				gnl|CDD|30625 COG0277, GlcD, FAD/FMN-containing dehydrogenases [Energy production and conversion]
FGSG_04741	438	1638	349.92	700	148.37	70.8241	28.3953	-1.31859	hypothetical protein				gnl|CDD|66806 pfam03154, Atrophin-1, Atrophin-1 family. Atrophin-1 is the protein product of the dentatorubral-pallidoluysian atrophy (DRPLA) gene. DRPLA OMIM:125370 is a progressive neurodegenerative disorder. It is caused by the expansion of a CAG repeat in the DRPLA gene on chromosome 12p. This results in an extended polyglutamine region in atrophin-1, that is thought to confer toxicity to the…
FGSG_04746	1056	10	0.87	5	0.4	0.17934	0.0841258	-1.09208	hypothetical protein				NA
FGSG_04780	2079	23	0.92	2	0.08	0.209515	0.0170922	-3.61564	hypothetical protein		overlapped		gnl|CDD|33854 COG4097, COG4097, Predicted ferric reductase [Inorganic ion transport and metabolism]
FGSG_04828	1287	151	10.16	60	2.24	2.22198	0.828315	-1.42359	hypothetical protein				gnl|CDD|65058 pfam01231, IDO, Indoleamine 2,3-dioxygenase
FGSG_04874	792	1032	126.05	500	60.59	24.6772	11.2168	-1.13752	hypothetical protein				gnl|CDD|71967 pfam08539, HbrB, HbrB-like. HbrB is involved hyphal growth and polarity
FGSG_04921	498	24	4.47	9	1.62	0.91269	0.321097	-1.50712	hypothetical protein				gnl|CDD|34702 COG5099, COG5099, RNA-binding protein of the Puf family, translational repressor [Translation, ribosomal structure and biogenesis]
FGSG_04931	1530	4	0.21	2	0.13	0.0495119	0.0232253	-1.09208	hypothetical protein		overlapped		NA
FGSG_04975	327	618	179.1	135	39.09	35.7917	7.33515	-2.28673	hypothetical protein		overlapped		gnl|CDD|64140 pfam00260, Protamine_P1, Protamine P1
FGSG_05017	825	9	0.79	3	0.25	0.2066	0.0646086	-1.67704	hypothetical protein				gnl|CDD|34840 COG5243, HRD1, HRD ubiquitin ligase complex, ER membrane component [Posttranslational modification, protein turnover, chaperones]
FGSG_05022	864	10	0.97	4	0.32	0.219193	0.0822563	-1.41401	hypothetical protein				NA
FGSG_05042	1605	288	17.39	124	7.35	3.39828	1.37268	-1.30781	hypothetical protein		overlapped		gnl|CDD|71131 pfam07690, MFS_1, Major Facilitator Superfamily
FGSG_05048	939	195	19.42	99	9.94	3.93288	1.87324	-1.07005	hypothetical protein			overlapped	gnl|CDD|30677 COG0329, DapA, Dihydrodipicolinate synthase/N-acetylneuraminate lyase [Amino acid transport and metabolism / Cell envelope biogenesis, outer membrane]
FGSG_05080	2712	992	36.02	497	18.14	6.92729	3.25604	-1.08917	hypothetical protein				gnl|CDD|64735 pfam00884, Sulfatase, Sulfatase
FGSG_05084	723	310	41.13	156	20.92	8.12016	3.83362	-1.0828	hypothetical protein				gnl|CDD|64075 pfam00190, Cupin_1, Cupin. This family represents the conserved barrel domain of the 'cupin' superfamily ('cupa' is the Latin term for a small barrel). This family contains 11S and 7S plant seed storage proteins, and germins. Plant seed storage proteins provide the major nitrogen source for the developing plant
FGSG_05129	351	37	9.7	19	4.74	1.99635	0.961766	-1.0536	hypothetical protein				gnl|CDD|65122 pfam01299, Lamp, Lysosome-associated membrane glycoprotein (Lamp)
FGSG_05228	1185	28	2.11	8	0.54	0.447488	0.119948	-1.89943	hypothetical protein				gnl|CDD|71256 pfam07816, DUF1645, Protein of unknown function (DUF1645). These sequences are derived from a number of hypothetical plant proteins. The region in question is approximately 270 amino acids long. Some members of this family are annotated as yeast pheromone receptor proteins AR781 but no literature was found to support this
FGSG_05397	807	4138	490.34	1968	234.47	97.1087	43.3286	-1.16428	hypothetical protein				gnl|CDD|66806 pfam03154, Atrophin-1, Atrophin-1 family. Atrophin-1 is the protein product of the dentatorubral-pallidoluysian atrophy (DRPLA) gene. DRPLA OMIM:125370 is a progressive neurodegenerative disorder. It is caused by the expansion of a CAG repeat in the DRPLA gene on chromosome 12p. This results in an extended polyglutamine region in atrophin-1, that is thought to confer toxicity to the…
FGSG_05546	1314	7633	567.53	3954	293.64	110.012	53.4643	-1.04102	ornithine aminotransferase				gnl|CDD|34597 COG4992, ArgD, Ornithine/acetylornithine aminotransferase [Amino acid transport and metabolism]
FGSG_05552	357	24	6.29	5	1.35	1.27316	0.248843	-2.35511	hypothetical protein				gnl|CDD|71114 pfam07672, MFS_Mycoplasma, Mycoplasma MFS transporter. These proteins share some similarity with members of the Major Facilitator Superfamily (MFS)
FGSG_05606	1137	170	14.36	70	6.11	2.83159	1.09386	-1.37219	hypothetical protein				gnl|CDD|66806 pfam03154, Atrophin-1, Atrophin-1 family. Atrophin-1 is the protein product of the dentatorubral-pallidoluysian atrophy (DRPLA) gene. DRPLA OMIM:125370 is a progressive neurodegenerative disorder. It is caused by the expansion of a CAG repeat in the DRPLA gene on chromosome 12p. This results in an extended polyglutamine region in atrophin-1, that is thought to confer toxicity to the…
FGSG_05622	1944	126	6.07	36	1.72	1.22748	0.329025	-1.89943	hypothetical protein			overlapped	gnl|CDD|31813 COG1626, TreA, Neutral trehalase [Carbohydrate transport and metabolism]
FGSG_05652	1518	8	0.41	4	0.18	0.0998067	0.0468178	-1.09208	hypothetical protein		overlapped		NA
FGSG_05660	2220	4	0.13	2	0.06	0.0341231	0.0160066	-1.09208	hypothetical protein		overlapped		gnl|CDD|47402 smart00053, DYNc, Dynamin, GTPase; Large GTPases that mediate vesicle trafficking. Dynamin participates in the endocytic uptake of receptors, associated ligands, and plasma membrane following an exocytic event
FGSG_05662	984	6	0.5	2	0.17	0.115478	0.0361125	-1.67704	hypothetical protein				gnl|CDD|30648 COG0300, DltE, Short-chain dehydrogenases of various substrate specificities [General function prediction only]
FGSG_05678	1212	83	6.01	37	2.66	1.29693	0.542403	-1.25766	hypothetical protein				gnl|CDD|65089 pfam01266, DAO, FAD dependent oxidoreductase. This family includes various FAD dependent oxidoreductases: Glycerol-3-phosphate dehydrogenase EC:1.1.99.5, Sarcosine oxidase beta subunit EC:1.5.3.1, D-alanine oxidase EC:1.4.99.1, D-aspartate oxidase EC:1.4.3.1
FGSG_05710	477	88	17.88	39	8.05	3.49386	1.45268	-1.26611	hypothetical protein				NA
FGSG_05715	669	4	0.44	2	0.22	0.113234	0.0531162	-1.09208	hypothetical protein				NA
FGSG_05716	1668	1911	111.43	958	56.01	21.6973	10.2045	-1.08831	hypothetical protein	TF			gnl|CDD|47414 smart00066, GAL4, GAL4-like Zn(II)2Cys6 (or C6 zinc) binuclear cluster DNA-binding domain; Gal4 is a positive regulator for the gene expression of the galactose- induced genes of S. cerevisiae. Is present only in fungi
FGSG_05719	3462	527	14.79	90	2.58	2.88287	0.46189	-2.64188	hypothetical protein		overlapped		gnl|CDD|68674 pfam05109, Herpes_BLLF1, Herpes virus major outer envelope glycoprotein (BLLF1). This family consists of the BLLF1 viral late glycoprotein, also termed gp350/220. It is the most abundantly expressed glycoprotein in the viral envelope of the Herpesviruses and is the major antigen responsible for stimulating the production of neutralising antibodies in vivo
FGSG_05754	873	139	13.2	44	4.12	3.01538	0.895491	-1.75159	hypothetical protein				gnl|CDD|65482 pfam01690, PLRV_ORF5, Potato leaf roll virus readthrough protein. This family consists mainly of the potato leaf roll virus readthrough protein. This is generated via a readthrough of open reading frame 3 a coat protein allowing transcription of open reading frame 5 to give an extended coat protein with a large c-terminal addition or read through domain. The readthrough protein is t…
FGSG_05782	1875	8	0.41	1	0.02	0.0808035	0.00947592	-3.09208	hypothetical protein				gnl|CDD|66175 pfam02459, Adeno_terminal, Adenoviral DNA terminal protein. This protein is covalently attached to the terminii of replicating DNA in vivo
FGSG_05804	309	7	1.99	2	0.65	0.429023	0.114999	-1.89943	hypothetical protein				NA
FGSG_05820	1185	4	0.23	2	0.12	0.0639268	0.0299871	-1.09208	hypothetical protein				gnl|CDD|32408 COG2226, UbiE, Methylase involved in ubiquinone/menaquinone biosynthesis [Coenzyme metabolism]
FGSG_05838	762	13	1.2	5	0.45	0.323095	0.116584	-1.47059	hypothetical protein				gnl|CDD|33678 COG3889, COG3889, Predicted solute binding protein [General function prediction only]
FGSG_05839	1623	449	26.75	127	7.52	5.23925	1.3903	-1.91397	hypothetical protein		overlapped		gnl|CDD|63971 pfam00083, Sugar_tr, Sugar (and other) transporter
FGSG_05866	384	2	0.31	1	0.22	0.0986371	0.0462692	-1.09208	hypothetical protein		overlapped		gnl|CDD|47550 smart00220, S_TKc, Serine/Threonine protein kinases, catalytic domain; Phosphotransferases. Serine or threonine-specific kinase subfamily
FGSG_05906	1050	79	6.74	42	3.58	1.42488	0.710694	-1.00354	hypothetical protein		overlapped		gnl|CDD|73213 cd00519, Lipase_3, Lipase (class 3). Lipases are esterases that can hydrolyze long-chain acyl-triglycerides into di- and monoglycerides, glycerol, and free fatty acids at a water/lipid interface. A typical feature of lipases is "interfacial activation," the process of becoming active at the lipid/water interface, although several examples of lipases have been identified that do not …
FGSG_05989	2205	12	0.35	4	0.08	0.103066	0.032231	-1.67704	hypothetical protein				gnl|CDD|68674 pfam05109, Herpes_BLLF1, Herpes virus major outer envelope glycoprotein (BLLF1). This family consists of the BLLF1 viral late glycoprotein, also termed gp350/220. It is the most abundantly expressed glycoprotein in the viral envelope of the Herpesviruses and is the major antigen responsible for stimulating the production of neutralising antibodies in vivo
FGSG_06134	654	36	4.54	7	0.85	1.04248	0.190171	-2.45465	hypothetical protein		overlapped		NA
FGSG_06187	408	8	1.6	2	0.46	0.37134	0.0870949	-2.09208	hypothetical protein				NA
FGSG_06208	1497	103	6.25	28	1.75	1.30304	0.332322	-1.97122	hypothetical protein		overlapped		gnl|CDD|67080 pfam03443, Glyco_hydro_61, Glycosyl hydrolase family 61
FGSG_06229	522	477	84.3	147	25.96	17.3057	5.00345	-1.79025	hypothetical protein				gnl|CDD|66895 pfam03251, Tymo_45kd_70kd, Tymovirus 45/70Kd protein. Tymoviruses are single stranded RNA viruses. This family includes a protein of unknown function that has been named based on its molecular weight. Tymoviruses such as the ononis yellow mosaic tymovirus encode only three proteins. Of these two are overlapping this protein overlaps a larger ORF that is thought to be the polymerase
FGSG_06278	1902	26	1.15	11	0.53	0.258883	0.102755	-1.33309	glucoamylase precursor				gnl|CDD|33194 COG3387, SGA1, Glucoamylase and related glycosyl hydrolases [Carbohydrate transport and metabolism]
FGSG_06397	927	88	8.72	25	2.6	1.79781	0.479163	-1.90765	hypothetical protein				gnl|CDD|67080 pfam03443, Glyco_hydro_61, Glycosyl hydrolase family 61
FGSG_06432	804	91	10.91	33	3.93	2.14352	0.729257	-1.55548	hypothetical protein				NA
FGSG_06433	1362	29	1.52	13	0.53	0.403239	0.169586	-1.24962	hypothetical protein				gnl|CDD|30042 cd01299, Met_dep_hydrolase_A, Metallo-dependent hydrolases, subgroup A is part of the superfamily of metallo-dependent hydrolases, a large group of proteins that show conservation in their 3-dimensional fold (TIM barrel) and in details of their active site. The vast majority of the members have a conserved metal binding site, involving four histidines and one aspartic acid residue. …
FGSG_06479	2289	3299	139.77	1157	49.05	27.2947	8.98071	-1.60372	hypothetical protein				gnl|CDD|68674 pfam05109, Herpes_BLLF1, Herpes virus major outer envelope glycoprotein (BLLF1). This family consists of the BLLF1 viral late glycoprotein, also termed gp350/220. It is the most abundantly expressed glycoprotein in the viral envelope of the Herpesviruses and is the major antigen responsible for stimulating the production of neutralising antibodies in vivo
FGSG_06480	963	18	1.72	6	0.58	0.353987	0.1107	-1.67704	hypothetical protein		overlapped		gnl|CDD|64648 pfam00795, CN_hydrolase, Carbon-nitrogen hydrolase. This family contains hydrolases that break carbon-nitrogen bonds. The family includes: Nitrilase EC:3.5.5.1, Aliphatic amidase EC:3.5.1.4, Biotidinase EC:3.5.1.12, Beta-ureidopropionase EC:3.5.1.6. Nitrilase-related proteins generally have a conserved E-K-C catalytic triad, and are multimeric alpha-beta-beta-alpha sandwich proteins
FGSG_06497	1119	697	60.1	305	26.53	11.7963	4.84276	-1.28443	hypothetical protein				gnl|CDD|30941 COG0596, MhpC, Predicted hydrolases or acyltransferases (alpha/beta hydrolase superfamily) [General function prediction only]
FGSG_06506	936	102	10.16	31	3	2.06379	0.588449	-1.81031	member io TFC68				gnl|CDD|66806 pfam03154, Atrophin-1, Atrophin-1 family. Atrophin-1 is the protein product of the dentatorubral-pallidoluysian atrophy (DRPLA) gene. DRPLA OMIM:125370 is a progressive neurodegenerative disorder. It is caused by the expansion of a CAG repeat in the DRPLA gene on chromosome 12p. This results in an extended polyglutamine region in atrophin-1, that is thought to confer toxicity to the…
FGSG_06564	687	8949	1256.19	3638	512.46	246.694	94.0868	-1.39066	hypothetical protein				gnl|CDD|70402 pfam06933, SSP160, Special lobe-specific silk protein SSP160. This family consists of several special lobe-specific silk protein SSP160 sequences which appear to be specific to Chironomus (Midge) species
FGSG_06605	2661	177	6.38	40	1.44	1.25971	0.267078	-2.23776	beta-glucosidase 1 precursor				gnl|CDD|65687 pfam01915, Glyco_hydro_3_C, Glycosyl hydrolase family 3 C terminal domain. This domain is involved in catalysis and may be involved in binding beta-glucan. This domain is found associated with pfam00933
FGSG_06612	1497	2355	153.79	1147	74.85	29.7927	13.6133	-1.12994	hypothetical protein				gnl|CDD|32323 COG2140, COG2140, Thermophilic glucose-6-phosphate isomerase and related metalloenzymes [Carbohydrate transport and metabolism / General function prediction only]
FGSG_06650	426	2	0.31	1	0.06	0.0889123	0.0417074	-1.09208	hypothetical protein				NA
FGSG_06728	483	53	9.8	23	3.92	2.07812	0.846065	-1.29644	hypothetical protein		overlapped		gnl|CDD|68104 pfam04519, DUF583, Protein of unknown function, DUF583. This family contains several uncharacterised hypothetical proteins
FGSG_06734	303	8	2.41	4	1.13	0.500022	0.234553	-1.09208	hypothetical protein				gnl|CDD|64983 pfam01150, GDA1_CD39, GDA1/CD39 (nucleoside phosphatase) family
FGSG_06780	597	3	0.32	1	0.11	0.0951674	0.0297611	-1.67704	member of TFC69				gnl|CDD|69843 pfam06346, Drf_FH1, Formin Homology Region 1. This region is found in some of the Diaphanous related formins (Drfs). It consists of low complexity repeats of around 12 residues
FGSG_06797	2190	6	0.2	2	0.08	0.0518858	0.0162259	-1.67704	hypothetical protein		overlapped		gnl|CDD|72020 pfam08595, RXT2_N, RXT2-like, N-terminal. The family represents the N-terminal region of RXT2-like proteins. In S. cerevisiae, RXT2 has been demonstrated to be involved in conjugation with cellular fusion (mating) and invasive growth. A high throughput localisation study has localised RXT2 to the nucleus
FGSG_06842	1221	5611	442.63	2306	181.28	87.0294	33.5557	-1.37494	hypothetical protein		overlapped		gnl|CDD|68674 pfam05109, Herpes_BLLF1, Herpes virus major outer envelope glycoprotein (BLLF1). This family consists of the BLLF1 viral late glycoprotein, also termed gp350/220. It is the most abundantly expressed glycoprotein in the viral envelope of the Herpesviruses and is the major antigen responsible for stimulating the production of neutralising antibodies in vivo
FGSG_06898	387	15	3.16	6	1.32	0.734043	0.275463	-1.41401	hypothetical protein				NA
FGSG_07052	477	3059	600.72	1240	242.6	121.451	46.1877	-1.3948	hypothetical protein				gnl|CDD|34653 COG5048, COG5048, FOG: Zn-finger [General function prediction only]
FGSG_07188	1950	729	36.57	335	16.86	7.08002	3.05234	-1.21384	hypothetical protein				gnl|CDD|31361 COG1167, ARO8, Transcriptional regulators containing a DNA-binding HTH domain and an aminotransferase domain (MocR family) and their eukaryotic orthologs [Transcription / Amino acid transport and metabolism]
FGSG_07238	2034	676	32.32	229	11.02	6.29415	2.00036	-1.65375	hypothetical protein				gnl|CDD|47649 smart00321, WSC, present in yeast cell wall integrity and stress response component proteins; Domain present in WSC proteins, polycystin and fungal exoglucanase
FGSG_07270	1371	20	1.27	2	0.11	0.27627	0.0259188	-3.41401	GzPRE1 (a pheromone receptor)				gnl|CDD|65828 pfam02076, STE3, Pheromone A receptor
FGSG_07367	906	3	0.19	1	0.07	0.0627097	0.0196108	-1.67704	hypothetical protein				NA
FGSG_07389	1179	328	26.91	166	13.42	5.26867	2.5016	-1.07459	hypothetical protein		overlapped		gnl|CDD|31444 COG1252, Ndh, NADH dehydrogenase, FAD-containing subunit [Energy production and conversion]
FGSG_07516	4077	8	0.13	4	0.08	0.0371613	0.0174318	-1.09208	hypothetical protein		overlapped		gnl|CDD|31327 COG1132, MdlB, ABC-type multidrug transport system, ATPase and permease components [Defense mechanisms]
FGSG_07564	1863	5377	280.31	2352	122.31	54.6599	22.4309	-1.28499	hypothetical protein				gnl|CDD|71131 pfam07690, MFS_1, Major Facilitator Superfamily
FGSG_07582	1743	4116	231.62	1228	69.27	44.7218	12.5177	-1.83701	member of TFC71				gnl|CDD|71131 pfam07690, MFS_1, Major Facilitator Superfamily
FGSG_07587	1599	5372	327.18	2558	155.54	63.6252	28.4233	-1.16252	member of TFC71				gnl|CDD|63971 pfam00083, Sugar_tr, Sugar (and other) transporter
FGSG_07595	411	114	26.1	48	10.93	5.25296	2.07502	-1.34001	member of TFC71				gnl|CDD|65335 pfam01528, Herpes_glycop, Herpesvirus glycoprotein M. The herpesvirus glycoprotein M (gM) is an integral membrane protein predicted to contain 8 transmembrane segments. Glycoprotein M is not essential for viral replication
FGSG_07601	1041	14	0.98	1	0.06	0.254694	0.0170676	-3.89943	hypothetical protein			overlapped	gnl|CDD|66718 pfam03062, MBOAT, MBOAT family. The MBOAT (membrane bound O-acyl transferase) family of membrane proteins contains a variety of acyltransferase enzymes. A conserved histidine has been suggested to be the active site residue
FGSG_07642	1881	13	0.6	6	0.27	0.130887	0.0566742	-1.20756	hypothetical protein				gnl|CDD|32255 COG2072, TrkA, Predicted flavoprotein involved in K+ transport [Inorganic ion transport and metabolism]
FGSG_07663	1227	331	26.1	104	8.13	5.10887	1.50595	-1.76233	member of TFC72				gnl|CDD|70704 pfam07248, DUF1431, Protein of unknown function (DUF1431). This family contains a number of Drosophila melanogaster proteins of unknown function. These contain several conserved cysteine residues
FGSG_07674	1302	1386	101.12	344	25.03	20.1601	4.69429	-2.10253	hypothetical protein		overlapped		gnl|CDD|67688 pfam04082, Fungal_trans, Fungal specific transcription factor domain
FGSG_07735	2223	10	0.32	5	0.17	0.0851926	0.0399626	-1.09208	hypothetical protein		overlapped		gnl|CDD|65447 pfam01650, Peptidase_C13, Peptidase C13 family. Members of this family are asparaginyl peptidases. The blood fluke parasite Schistosoma mansoni has at least five Clan CA cysteine peptidases in its digestive tract including cathepsins B (2 isoforms), C, F and L. All have been recombinantly expressed as active enzymes, albeit in various stages of activation. In addition, a Clan CD pep…
FGSG_07754	1248	2	0.04	1	0.02	0.0303499	0.0142367	-1.09208	hypothetical protein		overlapped		gnl|CDD|47554 smart00225, BTB, Broad-Complex, Tramtrack and Bric a brac; Domain in Broad-Complex, Tramtrack and Bric a brac. Also known as POZ (poxvirus and zinc finger) domain. Known to be a protein-protein interaction motif found at the N-termini of several C2H2-type transcription factors as well as Shaw-type potassium channels. Known structure reveals a tightly intertwined dimer formed via int…
FGSG_07772	1026	18	1.42	6	0.47	0.332251	0.103903	-1.67704	hypothetical protein		overlapped		gnl|CDD|29534 cd00413, Glyco_hydrolase_16, The O-Glycosyl hydrolases are a widespread group of enzymes that hydrolyse the glycosidic bond between two or more carbohydrates, or between a carbohydrate and a non-carbohydrate moiety. A glycosyl hydrolase classification system based on sequence similarity has led to the definition of more than 95 different families inlcuding glycoside hydrolase family…
FGSG_07784	825	8	0.75	2	0.16	0.183644	0.0430724	-2.09208	hypothetical protein		overlapped		gnl|CDD|47649 smart00321, WSC, present in yeast cell wall integrity and stress response component proteins; Domain present in WSC proteins, polycystin and fungal exoglucanase
FGSG_07793	1056	126	11.26	50	4.42	2.25969	0.841258	-1.4255	hypothetical protein				gnl|CDD|66619 pfam02958, DUF227, Domain of unknown function (DUF227). This family includes a large number of drosophila proteins of unknown function. The family also includes several C. elegans proteins. The alignment contains many histidines and aspartates that are conserved, suggesting a metal binding and possibly a phosphoesterase function (A Bateman pers. obs.)
FGSG_07798	11763	4744	39.54	30	0.26	7.63779	0.0453133	-7.39708	PKS10 for fusarin C				gnl|CDD|33130 COG3321, COG3321, Polyketide synthase modules and related proteins [Secondary metabolites biosynthesis, transport, and catabolism]
FGSG_07800	1110	2249	197.08	42	3.71	38.3714	0.672278	-5.83483	member of PKS10 cluster (TFC73)		overlapped		gnl|CDD|63915 pfam00026, Asp, Eukaryotic aspartyl protease. Aspartyl (acid) proteases include pepsins, cathepsins, and renins. Two-domain structure, probably arising from ancestral duplication. This family does not include the retroviral nor retrotransposon proteases (pfam00077), which are much smaller and appear to be homologous to a single domain of the eukaryotic asp proteases
FGSG_07801	702	3337	455.16	20	2.84	90.0244	0.506193	-7.47449	member of PKS10 cluster (TFC73)				gnl|CDD|65966 pfam02230, Abhydrolase_2, Phospholipase/Carboxylesterase. This family consists of both phospholipases and carboxylesterases with broad substrate specificity, and is structurally related to alpha/beta hydrolases pfam00561
FGSG_07802	1686	5176	293.62	16	0.89	58.1404	0.168611	-8.4297	member of PKS10 cluster (TFC73)			overlapped	gnl|CDD|71131 pfam07690, MFS_1, Major Facilitator Superfamily
FGSG_07803	1416	1379	88.44	7	0.46	18.4435	0.087833	-7.71413	member of PKS10 cluster (TFC73)				gnl|CDD|31216 COG1012, PutA, NAD-dependent aldehyde dehydrogenases [Energy production and conversion]
FGSG_07804	1464	14347	949	88	5.71	185.593	1.06798	-7.44111	member of PKS10 cluster (TFC73)				gnl|CDD|63955 pfam00067, p450, Cytochrome P450. Cytochrome P450s are haem-thiolate proteins involved in the oxidative degradation of various compounds. They are particularly well known for their role in the degradation of environmental toxins and mutagens. They can be divided into 4 classes, according to the method by which electrons from NAD(P)H are delivered to the catalytic site. Sequence cons…
FGSG_07805	984	3514	341.3	53	5.26	67.6313	0.956982	-6.14306	member of PKS10 cluster (TFC73)			overlapped	gnl|CDD|67129 pfam03492, Methyltransf_7, SAM dependent carboxyl methyltransferase. This family of plant methyltransferases contains enzymes that act on a variety of substrates including salicylic acid, jasmonic acid and 7-Methylxanthine. Caffeine is synthesised through sequential three-step methylation of xanthine derivatives at positions 7-N, 3-N, and 1-N. The protein 7-methylxanthine methyltran…
FGSG_07807	435	124	27.92	37	8.41	5.39851	1.51125	-1.83682	member of TFC74			overlapped	gnl|CDD|66806 pfam03154, Atrophin-1, Atrophin-1 family. Atrophin-1 is the protein product of the dentatorubral-pallidoluysian atrophy (DRPLA) gene. DRPLA OMIM:125370 is a progressive neurodegenerative disorder. It is caused by the expansion of a CAG repeat in the DRPLA gene on chromosome 12p. This results in an extended polyglutamine region in atrophin-1, that is thought to confer toxicity to the…
FGSG_07810	1482	6	0.3	2	0.07	0.0766733	0.0239775	-1.67704	hypothetical protein		overlapped		gnl|CDD|65299 pfam01490, Aa_trans, Transmembrane amino acid transporter protein. This transmembrane region is found in many amino acid transporters including UNC-47 and MTR. UNC-47 encodes a vesicular amino butyric acid (GABA) transporter, (VGAT). UNC-47 is predicted to have 10 transmembrane domains. MTR is a N system amino acid transporter system protein involved in methyltryptophan resistance. …
FGSG_07835	924	46	4.77	14	1.39	0.942817	0.269202	-1.80829	hypothetical protein		overlapped		gnl|CDD|66831 pfam03181, BURP, BURP domain. The BURP domain is found at the C-terminus of several different plant proteins. It was named after the proteins in which it was first identified: the BNM2 clone-derived protein from Brassica napus; USPs and USP-like proteins; RD22 from Arabidopsis thaliana; and PG1beta from Lycopersicon esculentum. This domain is around 230 amino acid residues long. It …
FGSG_07861	669	12	1.39	3	0.38	0.339701	0.0796743	-2.09208	hypothetical protein		overlapped		gnl|CDD|64692 pfam00841, Protamine_P2, Sperm histone P2. This protein also known as protamine P2 can substitute for histones in the chromatin of sperm. The alignment contains both the sequence of the mature P2 protein and its propeptide
FGSG_07968	1143	122	9.98	47	3.83	2.02141	0.730591	-1.46823	hypothetical protein				gnl|CDD|68064 pfam04479, RTA1, RTA1 like protein. This family is comprised of fungal proteins with multiple transmembrane regions. RTA1 is involved in resistance to 7-aminocholesterol, while RTM1 confers resistance to an an unknown toxic chemical in molasses. These proteins may bind to the toxic substance, and thus prevent toxicity. They are not thought to be involved in the efflux of xenobiotics
FGSG_07972	369	136	32.75	24	6.08	6.97998	1.1556	-2.59458	hypothetical protein				gnl|CDD|69443 pfam05920, Coprinus_mating, Coprinus cinereus mating-type protein. This family consists of several mating-type alpha and beta proteins from Coprinus cinereus (Inky cap fungus) as well as a related sequence from Schizophyllum commune (Bracket fungus). The A mating type locus of the fungus Coprinus cinereus is a complex, multigenic locus which regulates compatibility and subsequent se…
FGSG_07988	540	3932	687.29	1384	243.95	137.899	45.5371	-1.5985	hypothetical protein			overlapped	gnl|CDD|66806 pfam03154, Atrophin-1, Atrophin-1 family. Atrophin-1 is the protein product of the dentatorubral-pallidoluysian atrophy (DRPLA) gene. DRPLA OMIM:125370 is a progressive neurodegenerative disorder. It is caused by the expansion of a CAG repeat in the DRPLA gene on chromosome 12p. This results in an extended polyglutamine region in atrophin-1, that is thought to confer toxicity to the…
FGSG_07991	837	44	4.92	22	2.31	0.995563	0.467003	-1.09208	hypothetical protein				gnl|CDD|31046 COG0702, COG0702, Predicted nucleoside-diphosphate-sugar epimerases [Cell envelope biogenesis, outer membrane / Carbohydrate transport and metabolism]
FGSG_07996	1713	8	0.4	4	0.17	0.0884451	0.0414883	-1.09208	hypothetical protein				gnl|CDD|64029 pfam00144, Beta-lactamase, Beta-lactamase. This family appears to be distantly related to pfam00905 and PF00768 D-alanyl-D-alanine carboxypeptidase
FGSG_08014	1845	42	2.02	4	0.17	0.431116	0.03852	-3.4844	member of TFC32				gnl|CDD|63971 pfam00083, Sugar_tr, Sugar (and other) transporter
FGSG_08015	393	23585	5524.68	11687	2733.66	1136.54	528.364	-1.10504	member of TFC32				gnl|CDD|68069 pfam04484, DUF566, Family of unknown function (DUF566). Family of related proteins that is plant specific
FGSG_08064	2463	331	13.02	145	5.73	2.5451	1.04599	-1.28286	hypothetical protein	TF			gnl|CDD|68675 pfam05110, AF-4, AF-4 proto-oncoprotein. This family consists of AF4 (Proto-oncogene AF4) and FMR2 (Fragile X E mental retardation syndrome) nuclear proteins. These proteins have been linked to human diseases such as acute lymphoblastic leukaemia and mental retardation. The family also contains a Drosophila AF4 protein homologue Lilliputian which contains an AT-hook domain. Lilliput…
FGSG_08076	576	205	33.97	53	8.73	6.7402	1.63484	-2.04364	member of butenolide gene cluster(TFC31)				NA
FGSG_08078	1641	132	7.64	68	3.91	1.52337	0.736246	-1.04901	member of butenolide gene cluster(TFC31)				gnl|CDD|65239 pfam01425, Amidase, Amidase
FGSG_08087	411	13	2.53	3	0.52	0.599022	0.129689	-2.20756					gnl|CDD|68674 pfam05109, Herpes_BLLF1, Herpes virus major outer envelope glycoprotein (BLLF1). This family consists of the BLLF1 viral late glycoprotein, also termed gp350/220. It is the most abundantly expressed glycoprotein in the viral envelope of the Herpesviruses and is the major antigen responsible for stimulating the production of neutralising antibodies in vivo
FGSG_08096	1572	5	0.18	2	0.07	0.0602364	0.0226048	-1.41401	hypothetical protein				gnl|CDD|70450 pfam06985, HET, Heterokaryon incompatibility protein (HET). This family represents a conserved region approximately 150 residues long within various heterokaryon incompatibility proteins that seem to be restricted to ascomycete fungi. Genetic differences in specific het genes prevent a viable heterokaryotic fungal cell from being formed by the fusion of filaments from two different …
FGSG_08107	573	30	4.71	14	2.28	0.991535	0.434106	-1.19161	hypothetical protein				gnl|CDD|68424 pfam04849, HAP1_N, HAP1 N-terminal conserved region. This family represents an N-terminal conserved region found in several huntingtin-associated protein 1 (HAP1) homologues. HAP1 binds to huntingtin in a polyglutamine repeat-length-dependent manner. However, its possible role in the pathogenesis of Huntington's disease is unclear. This family also includes a similar N-terminal cons…
FGSG_08178	741	2	0.12	1	0.06	0.0511156	0.0239775	-1.09208	member of TFC30				gnl|CDD|69816 pfam06314, ADC, Acetoacetate decarboxylase (ADC). This family consists of several acetoacetate decarboxylase (ADC) proteins (EC:4.1.1.4)
FGSG_08193	1521	127	8.08	66	4.21	1.58131	0.77097	-1.03637	member of TFC30			overlapped	gnl|CDD|33340 COG3538, COG3538, Uncharacterized conserved protein [Function unknown]
FGSG_08209	13272	3	0.01	1	0	0.00428081	0.00133871	-1.67704	NPS7 (TFC29)		overlapped		gnl|CDD|31223 COG1020, EntF, Non-ribosomal peptide synthetase modules and related proteins [Secondary metabolites biosynthesis, transport, and catabolism]
FGSG_08297	657	10	0.87	1	0.06	0.288254	0.0270432	-3.41401	hypothetical protein				gnl|CDD|72117 pfam08693, SKG6, Membrane protein SKG6. SKG6 is a novel membrane protein that shows polarised intracellular localisation
FGSG_08344	408	24	5.2	10	2.3	1.11402	0.435474	-1.35511	hypothetical protein				NA
FGSG_08414	1062	86	6.81	45	3.77	1.53361	0.752854	-1.02649	hypothetical protein				gnl|CDD|31017 COG0673, MviM, Predicted dehydrogenases and related proteins [General function prediction only]
FGSG_08464	1347	310	22.3	115	8.4	4.35848	1.51689	-1.52271	hypothetical protein				gnl|CDD|63970 pfam00082, Peptidase_S8, Subtilase family. Subtilases are a family of serine proteases. They appear to have independently and convergently evolved an Asp/Ser/His catalytic triad, like that found in the trypsin serine proteases (see pfam00089). Structure is an alpha/beta fold containing a 7-stranded parallel beta sheet, order 2314567
FGSG_08484	1092	24	1.91	8	0.5	0.416227	0.130164	-1.67704	hypothetical protein				gnl|CDD|33116 COG3307, RfaL, Lipid A core - O-antigen ligase and related enzymes [Cell envelope biogenesis, outer membrane]
FGSG_08533	2646	48	1.46	22	0.75	0.343552	0.147726	-1.21761	hypothetical protein				gnl|CDD|31408 COG1215, COG1215, Glycosyltransferases, probably involved in cell wall biogenesis [Cell envelope biogenesis, outer membrane]
FGSG_08534	1443	176	11.71	66	4.41	2.30987	0.812644	-1.50712	hypothetical protein				gnl|CDD|29540 cd02180, GH16_laminarinase, Laminarinase, also known as glucan endo-1,3-beta-D-glucosidase, is a glycosyl hydrolase family 16 member that hydrolyzes 1,3-beta-D-glucosidic linkages in 1,3-beta-D-glucans such as laminarins, curdlans, paramylons, and pachymans, with very limited action on mixed-link (1,3-1,4-)-beta-D-glucans
FGSG_08580	438	2	0.33	1	0.07	0.0864763	0.0405647	-1.09208	hypothetical protein				NA
FGSG_08616	504	6	0.88	1	0.12	0.225456	0.0352527	-2.67704	hypothetical protein				gnl|CDD|30385 COG0036, Rpe, Pentose-5-phosphate-3-epimerase [Carbohydrate transport and metabolism]
FGSG_08618	648	20	2.99	10	1.41	0.584516	0.274188	-1.09208	hypothetical protein				gnl|CDD|48573 cd03024, DsbA_FrnE, DsbA family, FrnE subfamily; FrnE is a DsbA-like protein containing a CXXC motif. It is presumed to be a thiol oxidoreductase involved in polyketide biosynthesis, specifically in the production of the aromatic antibiotics frenolicin and nanaomycins
FGSG_08687	975	662	64.95	267	26.31	12.8586	4.86552	-1.40207	hypothetical protein				NA
FGSG_08697	576	818	132.74	386	62.69	26.895	11.9066	-1.17558	hypothetical protein		overlapped		gnl|CDD|67748 pfam04145, Ctr, Ctr copper transporter family. The redox active metal copper is an essential cofactor in critical biological processes such as respiration, iron transport, oxidative stress protection, hormone production, and pigmentation. A widely conserved family of high-affinity copper transport proteins (Ctr proteins) mediates copper uptake at the plasma membrane. A series of clu…
FGSG_08787	471	2	0.27	1	0.11	0.0804175	0.0377226	-1.09208	hypothetical protein				gnl|CDD|31321 COG1124, DppF, ABC-type dipeptide/oligopeptide/nickel transport system, ATPase component [Amino acid transport and metabolism / Inorganic ion transport and metabolism]
FGSG_08844	2595	1519	57.34	530	19.98	11.0857	3.62879	-1.61114	hypothetical protein		overlapped		gnl|CDD|66895 pfam03251, Tymo_45kd_70kd, Tymovirus 45/70Kd protein. Tymoviruses are single stranded RNA viruses. This family includes a protein of unknown function that has been named based on its molecular weight. Tymoviruses such as the ononis yellow mosaic tymovirus encode only three proteins. Of these two are overlapping this protein overlaps a larger ORF that is thought to be the polymerase
FGSG_08908	1089	3	0.1	1	0.03	0.0521717	0.0163153	-1.67704	hypothetical protein				gnl|CDD|48437 cd01902, Ntn_CGH, Choloylglycine hydrolase (CGH) is a bile salt-modifying enzyme that hydrolyzes non-peptide carbon-nitrogen bonds in choloylglycine and choloyltaurine, both of which are present in bile. CGH is present in a number of probiotic microbial organisms that inhabit the gut. CGH has an N-terminal nucleophilic cysteine, as do other members of the Ntn hydrolase family to whi…
FGSG_09050	1017	18	1.65	6	0.45	0.335191	0.104822	-1.67704	hypothetical protein		overlapped		NA
FGSG_09066	249	4938	1790.11	518	189.61	375.572	36.9618	-3.34498	member of TFC75		overlapped		gnl|CDD|64140 pfam00260, Protamine_P1, Protamine P1
FGSG_09078	1446	75	4.73	29	1.76	0.982278	0.35633	-1.46292	member of TFC75		overlapped		gnl|CDD|65299 pfam01490, Aa_trans, Transmembrane amino acid transporter protein. This transmembrane region is found in many amino acid transporters including UNC-47 and MTR. UNC-47 encodes a vesicular amino butyric acid (GABA) transporter, (VGAT). UNC-47 is predicted to have 10 transmembrane domains. MTR is a N system amino acid transporter system protein involved in methyltryptophan resistance. …
FGSG_09091	930	67	6.56	34	3.32	1.36437	0.649559	-1.07071	hypothetical protein			overlapped	gnl|CDD|70289 pfam06814, Lung_7-TM_R, Lung seven transmembrane receptor. This family represents a conserved region with eukaryotic lung seven transmembrane receptors and related proteins
FGSG_09175	714	2	0.11	1	0.05	0.0530485	0.0248843	-1.09208	hypothetical protein		overlapped		NA
FGSG_09183	1323	2	0.09	1	0.04	0.0286293	0.0134296	-1.09208	hypothetical protein		overlapped		gnl|CDD|64742 pfam00891, Methyltransf_2, O-methyltransferase. This family includes a range of O-methyltransferases. These enzymes utilise S-adenosyl methionine
FGSG_09208	936	10	0.86	2	0.18	0.202332	0.0379644	-2.41401	hypothetical protein				gnl|CDD|64996 pfam01163, RIO1, RIO1 family. This is a family of atypical serine kinases which are found in archaea, bacteria and eukaryotes. Activity of Rio1 is vital in Saccharomyces cerevisiae for the processing of ribosomal RNA, as well as for proper cell cycle progression and chromosome maintenance. The structure of RIO1 has been determined
FGSG_09210	1062	185	17.1	79	7.23	3.29905	1.32168	-1.31968	hypothetical protein				gnl|CDD|68064 pfam04479, RTA1, RTA1 like protein. This family is comprised of fungal proteins with multiple transmembrane regions. RTA1 is involved in resistance to 7-aminocholesterol, while RTM1 confers resistance to an an unknown toxic chemical in molasses. These proteins may bind to the toxic substance, and thus prevent toxicity. They are not thought to be involved in the efflux of xenobiotics
FGSG_09236	2256	137	5.6	46	1.84	1.15007	0.362278	-1.66655	hypothetical protein				gnl|CDD|67390 pfam03772, Competence, Competence protein. Members of this family are integral membrane proteins with 6 predicted transmembrane helices. Some members of this family have been shown to be essential for bacterial competence in uptake of extracellular DNA. These proteins may transport DNA across the cell membrane. These proteins contain a highly conserved motif in the amino terminal tr…
FGSG_09287	2556	47	1.66	24	0.79	0.34824	0.16683	-1.06171	hypothetical protein				gnl|CDD|66819 pfam03169, OPT, OPT oligopeptide transporter protein. The OPT family of oligopeptide transporters is distinct from the ABC pfam00005 and PTR pfam00854 transporter families. OPT transporters were first recognised in fungi (Candida albicans and Schizosaccharomyces pombe), but this alignment also includes orthologues from Arabidopsis thaliana. OPT transporters are thought to have 12-14…
FGSG_09352	1140	10	0.69	4	0.31	0.166126	0.0623416	-1.41401	hypothetical protein		overlapped		gnl|CDD|31477 COG1286, CvpA, Uncharacterized membrane protein, required for colicin V production [General function prediction only]
FGSG_09445	2307	9	0.33	2	0.05	0.0738816	0.015403	-2.262	hypothetical protein				gnl|CDD|34993 COG5434, PGU1, Endopygalactorunase [Cell envelope biogenesis, outer membrane]
FGSG_09536	1452	160	10.37	79	5.02	2.08687	0.966681	-1.11023	hypothetical protein				NA
FGSG_09742	642	2470	372.56	1306	196.54	72.8624	36.1436	-1.01143	hypothetical protein		overlapped		gnl|CDD|33589 COG3794, PetE, Plastocyanin [Energy production and conversion]
FGSG_09821	999	18	1.66	7	0.6	0.341231	0.124496	-1.45465	hypothetical protein				gnl|CDD|34081 COG4372, COG4372, Uncharacterized protein conserved in bacteria with the myosin-like domain [Function unknown]
FGSG_10023	357	23	5.69	4	0.73	1.22012	0.199074	-2.61564	hypothetical protein				gnl|CDD|70561 pfam07102, DUF1364, Protein of unknown function (DUF1364). This family consists of several bacterial and phage proteins of around 95 residues in length. The function of this family is unknown
FGSG_10079	474	50	9.02	13	2.25	1.99771	0.48729	-2.0355	hypothetical protein				gnl|CDD|73247 cd01115, SLC13_permease, Permease SLC13 (solute carrier 13). The sodium/dicarboxylate cotransporter NaDC-1 has been shown to translocate Krebs cycle intermediates such as succinate, citrate, and alpha-ketoglutarate across plasma membranes rabbit, human, and rat kidney. It is related to renal and intestinal Na+/sulfate cotransporters and a few putative bacterial permeases. The SLC13-…
FGSG_10081	1560	2352	146.66	1215	75.93	28.5532	13.838	-1.04501	hypothetical protein		overlapped		gnl|CDD|32020 COG1835, COG1835, Predicted acyltransferases [Lipid metabolism]
FGSG_10237	2715	4	0.1	1	0.02	0.0279018	0.00654415	-2.09208	hypothetical protein				gnl|CDD|48003 smart00736, CADG, Dystroglycan-type cadherin-like domains. Cadherin-homologous domains present in metazoan dystroglycans and alpha/epsilon sarcoglycans, yeast Axl2p and in a very large protein from magnetotactic bacteria. Likely to bind calcium ions
FGSG_10252	255	6	2.18	2	0.65	0.445607	0.139352	-1.67704	hypothetical protein		overlapped		gnl|CDD|70631 pfam07175, Osteoregulin, Osteoregulin. This family represents a conserved region approximately 180 residues long within osteoregulin, a bone-remodelling protein expressed highly in osteocytes within trabecular and cortical bone. A conserved RGD motif is found towards the C-terminal end of this region, and this is potentially involved in integrin recognition
FGSG_10397	1020	16	1.37	2	0.18	0.297072	0.034838	-3.09208	CLM1 for culmorin biosynthesis (TFC19)				gnl|CDD|69830 pfam06330, TRI5, Trichodiene synthase (TRI5). This family consists of several fungal trichodiene synthase proteins (EC:4.2.3.6). TRI5 encodes the enzyme trichodiene synthase, which has been shown to catalyse the first step in the trichothecene pathways of Fusarium and Trichothecium species
FGSG_10431	2556	53	1.9	24	0.78	0.392696	0.16683	-1.23504	hypothetical protein		overlapped		gnl|CDD|29234 cd01461, vWA_interalpha_trypsin_inhibitor, vWA_interalpha trypsin inhibitor (ITI): ITI is a glycoprotein composed of three polypeptides- two heavy chains and one light chain (bikunin). Bikunin confers the protease-inhibitor function while the heavy chains are involved in rendering stability to the extracellular matrix by binding to hyaluronic acid. The heavy chains carry the VWA dom…
FGSG_10435	5292	135	2.33	28	0.5	0.48312	0.0940072	-2.36154	hypothetical protein				gnl|CDD|68674 pfam05109, Herpes_BLLF1, Herpes virus major outer envelope glycoprotein (BLLF1). This family consists of the BLLF1 viral late glycoprotein, also termed gp350/220. It is the most abundantly expressed glycoprotein in the viral envelope of the Herpesviruses and is the major antigen responsible for stimulating the production of neutralising antibodies in vivo
FGSG_10592	381	204	49.8	69	16.52	10.1402	3.21771	-1.65598	hypothetical protein				gnl|CDD|65267 pfam01456, Mucin, Mucin-like glycoprotein. This family of trypanosomal proteins resemble vertebrate mucins. The protein consists of three regions. The N and C terminii are conserved between all members of the family, whereas the central region is not well conserved and contains a large number of threonine residues which can be glycosylated. Indirect evidence suggested that these gen…
FGSG_10597	849	52	5.73	6	0.6	1.15994	0.125564	-3.20756	hypothetical protein		overlapped		gnl|CDD|47780 smart00474, 35EXOc, 3'-5' exonuclease; 3' -5' exonuclease proofreading domain present in DNA polymerase I, Werner syndrome helicase, RNase D and other enzymes
FGSG_10598	600	93962	15123.8	41222	6656.45	2965.8	1220.68	-1.28074	hypothetical protein			overlapped	gnl|CDD|66806 pfam03154, Atrophin-1, Atrophin-1 family. Atrophin-1 is the protein product of the dentatorubral-pallidoluysian atrophy (DRPLA) gene. DRPLA OMIM:125370 is a progressive neurodegenerative disorder. It is caused by the expansion of a CAG repeat in the DRPLA gene on chromosome 12p. This results in an extended polyglutamine region in atrophin-1, that is thought to confer toxicity to the…
FGSG_10600	870	30	3.16	12	1.15	0.653045	0.245067	-1.41401	hypothetical protein		overlapped		gnl|CDD|66179 pfam02463, SMC_N, RecF/RecN/SMC N terminal domain. This domain is found at the N terminus of SMC proteins. The SMC (structural maintenance of chromosomes) superfamily proteins have ATP-binding domains at the N- and C-termini, and two extended coiled-coil domains separated by a hinge in the middle. The eukaryotic SMC proteins form two kind of heterodimers: the SMC1/SMC3 and the SMC2/…
FGSG_10608	1047	19641	1808.51	2648	245.08	355.27	44.936	-2.98297	a novel gene cluster				gnl|CDD|31231 COG1028, FabG, Dehydrogenases with different specificities (related to short-chain alcohol dehydrogenases) [Secondary metabolites biosynthesis, transport, and catabolism / General function prediction only]
FGSG_10609	1590	5036	308.84	928	56.57	59.9832	10.3699	-2.53216	a novel gene cluster				gnl|CDD|30625 COG0277, GlcD, FAD/FMN-containing dehydrogenases [Energy production and conversion]
FGSG_10611	1467	196	13.06	72	4.76	2.53027	0.872018	-1.53686	a novel gene cluster				gnl|CDD|30625 COG0277, GlcD, FAD/FMN-containing dehydrogenases [Energy production and conversion]
FGSG_10612	1350	110	7.62	24	1.64	1.54312	0.315864	-2.28848	a novel gene cluster		overlapped		gnl|CDD|30999 COG0654, UbiH, 2-polyprenyl-6-methoxyphenol hydroxylase and related FAD-dependent oxidoreductases [Coenzyme metabolism / Energy production and conversion]
FGSG_10613	1014	52	4.65	13	1.06	0.971196	0.227787	-2.09208	a novel gene cluster		overlapped		gnl|CDD|30731 COG0382, UbiA, 4-hydroxybenzoate polyprenyltransferase and related prenyltransferases [Coenzyme metabolism]
FGSG_10614	708	78	10.25	21	2.81	2.08642	0.526998	-1.98516	a novel gene cluster		overlapped		NA
FGSG_10625	690	85	11.25	40	5.52	2.33298	1.02999	-1.17954	hypothetical protein				NA
FGSG_10655	1941	396	20.2	98	4.99	3.86377	0.897064	-2.10673	hypothetical protein		overlapped		gnl|CDD|65578 pfam01794, Ferric_reduct, Ferric reductase like transmembrane component. This family includes a common region in the transmembrane proteins mammalian cytochrome B-245 heavy chain (gp91-phox), ferric reductase transmembrane component in yeast and respiratory burst oxidase from mouse-ear cress. This may be a family of flavocytochromes capable of moving electrons across the plasma memb…
FGSG_10687	1218	9	0.55	2	0.11	0.139938	0.0291746	-2.262	hypothetical protein				NA
FGSG_10753	1251	95	7.12	34	2.46	1.43816	0.482886	-1.57447	hypothetical protein				gnl|CDD|34459 COG4850, COG4850, Uncharacterized conserved protein [Function unknown]
FGSG_10852	618	7	0.85	1	0.16	0.214512	0.0287498	-2.89943	hypothetical protein				NA
FGSG_10971	1467	399	26.53	173	11.57	5.15091	2.09526	-1.2977	hypothetical protein				gnl|CDD|70802 pfam07350, DUF1479, Protein of unknown function (DUF1479). This family consists of several hypothetical Enterobacterial proteins, of around 420 residues in length. Members of this family are often known as YbiU. The function of this family is unknown
FGSG_10995	4419	65	1.24	23	0.47	0.278568	0.0924755	-1.59088	member of TFC56		overlapped		gnl|CDD|31327 COG1132, MdlB, ABC-type multidrug transport system, ATPase and permease components [Defense mechanisms]
FGSG_11039	1038	6	0.47	2	0.09	0.10947	0.0342338	-1.67704	hypothetical protein				gnl|CDD|65299 pfam01490, Aa_trans, Transmembrane amino acid transporter protein. This transmembrane region is found in many amino acid transporters including UNC-47 and MTR. UNC-47 encodes a vesicular amino butyric acid (GABA) transporter, (VGAT). UNC-47 is predicted to have 10 transmembrane domains. MTR is a N system amino acid transporter system protein involved in methyltryptophan resistance. …
FGSG_11040	654	4	0.5	2	0.26	0.115831	0.0543344	-1.09208	glutathione S-transferase		overlapped		gnl|CDD|30970 COG0625, Gst, Glutathione S-transferase [Posttranslational modification, protein turnover, chaperones]
FGSG_11047	327	14	3.09	4	0.99	0.810815	0.217338	-1.89943	hypothetical protein				gnl|CDD|32683 COG2855, COG2855, Predicted membrane protein [Function unknown]
FGSG_11065	501	28	4.98	12	2.17	1.05843	0.425565	-1.31447	hypothetical protein		overlapped		NA
FGSG_11079	1515	20	1.18	10	0.57	0.250011	0.117276	-1.09208	hypothetical protein				gnl|CDD|71131 pfam07690, MFS_1, Major Facilitator Superfamily
FGSG_11082	780	4	0.34	1	0.08	0.0971196	0.0227787	-2.09208	hypothetical protein				gnl|CDD|31231 COG1028, FabG, Dehydrogenases with different specificities (related to short-chain alcohol dehydrogenases) [Secondary metabolites biosynthesis, transport, and catabolism / General function prediction only]
FGSG_11097	2706	55	1.73	6	0.17	0.384925	0.0393955	-3.28848	hypothetical protein		overlapped		gnl|CDD|72535 pfam09118, DUF1929, Domain of unknown function (DUF1929). Members of this family adopt a secondary structure consisting of a bundle of seven, mostly antiparallel, beta-strands surrounding a hydrophobic core. The 7 strands are arranged in 2 sheets, in a Greek-key topology. Their precise function, has not, as yet, been defined, though they are mostly found in sugar-utilising enzymes, …
FGSG_11165	1248	77	5.84	38	2.7	1.16847	0.540993	-1.11094	hypothetical protein				NA
FGSG_11188	2247	39	1.56	6	0.23	0.328702	0.0474429	-2.79252	hypothetical protein				gnl|CDD|32004 COG1819, COG1819, Glycosyl transferases, related to UDP-glucuronosyltransferase [Carbohydrate transport and metabolism / Signal transduction mechanisms]
FGSG_11191	852	111	12.57	46	5.21	2.46732	0.959271	-1.36293	hypothetical protein				gnl|CDD|33658 COG3868, COG3868, Uncharacterized conserved protein [Function unknown]
FGSG_11192	1833	47	2.28	23	1.14	0.485598	0.22294	-1.12311	hypothetical protein				gnl|CDD|31424 COG1231, COG1231, Monoamine oxidase [Amino acid transport and metabolism]
FGSG_11224	2061	44	1.78	7	0.31	0.404311	0.0603452	-2.74416	hypothetical protein				gnl|CDD|58568 cd04267, ZnMc_ADAM_like, Zinc-dependent metalloprotease, ADAM_like or reprolysin_like subgroup. The adamalysin_like or ADAM family of metalloproteases contains proteolytic domains from snake venoms, proteases from the mammalian reproductive tract, and the tumor necrosis factor alpha convertase, TACE. ADAMs (A Disintegrin And Metalloprotease) are glycoproteins, which play roles in ce…
FGSG_11228	1968	97	4.5	12	0.55	0.933443	0.108338	-3.10703	hypothetical protein				gnl|CDD|32458 COG2303, BetA, Choline dehydrogenase and related flavoproteins [Amino acid transport and metabolism]
FGSG_11232	1425	2684	184.65	1382	95.17	35.6705	17.2312	-1.04971	hypothetical protein				gnl|CDD|31424 COG1231, COG1231, Monoamine oxidase [Amino acid transport and metabolism]
FGSG_11248	900	93	10	44	4.85	1.95696	0.868626	-1.17181	hypothetical protein				gnl|CDD|31016 COG0672, FTR1, High-affinity Fe2+/Pb2+ permease [Inorganic ion transport and metabolism]
FGSG_11257	1122	169	14.82	80	6.99	2.85256	1.26683	-1.17103	hypothetical protein				gnl|CDD|68481 pfam04909, Amidohydro_2, Amidohydrolase. These proteins are amidohydrolases that are related to pfam01979
FGSG_11269	684	16	1.8	8	0.89	0.443002	0.207805	-1.09208	hypothetical protein				gnl|CDD|34019 COG4297, COG4297, Uncharacterized protein containing double-stranded beta helix domain [Function unknown]
FGSG_11306	3687	27	0.52	6	0.12	0.138686	0.0289135	-2.262	member of NPS12 cluster(TFC64)				gnl|CDD|65405 pfam01602, Adaptin_N, Adaptin N terminal region. This family consists of the N terminal region of various alpha, beta and gamma subunits of the AP-1, AP-2 and AP-3 adaptor protein complexes. The adaptor protein (AP) complexes are involved in the formation of clathrin-coated pits and vesicles. The N-terminal region of the various adaptor proteins (APs) is constant by comparison to th…
FGSG_11322	1554	3	0.13	1	0.04	0.0365605	0.0114333	-1.67704	member of TFC63			overlapped	gnl|CDD|30877 COG0531, PotE, Amino acid transporters [Amino acid transport and metabolism]
FGSG_11328	1053	54	4.75	17	1.43	0.971196	0.286842	-1.7595	hypothetical protein			overlapped	gnl|CDD|70450 pfam06985, HET, Heterokaryon incompatibility protein (HET). This family represents a conserved region approximately 150 residues long within various heterokaryon incompatibility proteins that seem to be restricted to ascomycete fungi. Genetic differences in specific het genes prevent a viable heterokaryotic fungal cell from being formed by the fusion of filaments from two different …
FGSG_11339	1665	92	4.99	28	1.52	1.04644	0.29879	-1.80829	hypothetical protein				gnl|CDD|63971 pfam00083, Sugar_tr, Sugar (and other) transporter
FGSG_11368	354	37	9.77	9	2.47	1.97943	0.451713	-2.13161	hypothetical protein		overlapped		gnl|CDD|28910 cd00028, B_lectin, Bulb-type mannose-specific lectin. The domain contains a three-fold internal repeat (beta-prism architecture). The consensus sequence motif QXDXNXVXY is involved in alpha-D-mannose recognition. Lectins are carbohydrate-binding proteins which specifically recognize diverse carbohydrates and mediate a wide variety of biological processes, such as cell-cell and host-…
FGSG_11373	411	45	10.04	16	3.75	2.07354	0.691673	-1.58393	hypothetical protein				gnl|CDD|69090 pfam05548, Peptidase_M11, Gametolysin peptidase M11. In the unicellular biflagellated alga, Chlamydomonas reinhardtii, gametolysin, a zinc-containing metallo-protease, is responsible for the degradation of the cell wall. Homologues of gametolysin have also been reported in the simple multicellular organism, Volvox
FGSG_11375	1548	937	58.46	346	21.43	11.4633	3.97126	-1.52936	hypothetical protein		overlapped		gnl|CDD|71131 pfam07690, MFS_1, Major Facilitator Superfamily
FGSG_11376	1242	407	31.64	170	13.43	6.20603	2.43193	-1.35157	hypothetical protein		overlapped		gnl|CDD|31041 COG0697, RhaT, Permeases of the drug/metabolite transporter (DMT) superfamily [Carbohydrate transport and metabolism / Amino acid transport and metabolism / General function prediction only]
FGSG_11380	465	43	8.96	17	3.57	1.75129	0.649559	-1.43088	hypothetical protein				NA
FGSG_11391	2307	2	0.02	1	0.01	0.0164181	0.0077015	-1.09208	hypothetical protein		overlapped		gnl|CDD|68674 pfam05109, Herpes_BLLF1, Herpes virus major outer envelope glycoprotein (BLLF1). This family consists of the BLLF1 viral late glycoprotein, also termed gp350/220. It is the most abundantly expressed glycoprotein in the viral envelope of the Herpesviruses and is the major antigen responsible for stimulating the production of neutralising antibodies in vivo
FGSG_11399	1521	150	9.38	33	2.02	1.86768	0.385485	-2.2765	member of TFC61				gnl|CDD|65372 pfam01565, FAD_binding_4, FAD binding domain. This family consists of various enzymes that use FAD as a co-factor, most of the enzymes are similar to oxygen oxidoreductase. One of the enzymes Vanillyl-alcohol oxidase (VAO) has a solved structure, the alignment includes the FAD binding site, called the PP-loop, between residues 99-110. The FAD molecule is covalently bound in the know…
FGSG_11426	714	4	0.47	1	0.12	0.106097	0.0248843	-2.09208	hypothetical protein				NA
FGSG_11429	1056	46	4.02	13	1.04	0.824964	0.218727	-1.9152	hypothetical protein				gnl|CDD|65522 pfam01734, Patatin, Patatin-like phospholipase. This family consists of various patatin glycoproteins from plants. The patatin protein accounts for up to 40% of the total soluble protein in potato tubers. Patatin is a storage protein but it also has the enzymatic activity of lipid acyl hydrolase, catalysing the cleavage of fatty acids from membrane lipids. Members of this family hav…
FGSG_11442	432	71	14.68	30	6.08	3.11255	1.23384	-1.33494	hypothetical protein				gnl|CDD|65599 pfam01817, CM_2, Chorismate mutase type II. Chorismate mutase EC:5.4.99.5 catalyses the conversion of chorismate to prephenate in the pathway of tyrosine and phenylalanine biosynthesis. This enzyme is negatively regulated by tyrosine, tryptophan and phenylalanine
FGSG_11472	2628	601	22.49	170	6.32	4.33102	1.14933	-1.91391	hypothetical protein		overlapped		gnl|CDD|63970 pfam00082, Peptidase_S8, Subtilase family. Subtilases are a family of serine proteases. They appear to have independently and convergently evolved an Asp/Ser/His catalytic triad, like that found in the trypsin serine proteases (see pfam00089). Structure is an alpha/beta fold containing a 7-stranded parallel beta sheet, order 2314567
FGSG_11484	1134	4	0.21	2	0.11	0.0668018	0.0313357	-1.09208	glutaryl-CoA dehydrogenase				gnl|CDD|58331 cd00567, ACAD, Acyl-CoA dehydrogenase (ACAD). Both mitochondrial acyl-CoA dehydrogenases (ACAD) and peroxisomal acyl-CoA oxidases (AXO) catalyze the alpha,beta dehydrogenation of the corresponding trans-enoyl-CoA by FAD, which becomes reduced. The reduced form of ACAD is reoxidized in the oxidative half-reaction by electron-transferring flavoprotein (ETF), from which the electrons a…
FGSG_11487	984	64	6.03	10	0.92	1.23176	0.180563	-2.77015	endo-1,4-beta-xylanase precursor				gnl|CDD|66895 pfam03251, Tymo_45kd_70kd, Tymovirus 45/70Kd protein. Tymoviruses are single stranded RNA viruses. This family includes a protein of unknown function that has been named based on its molecular weight. Tymoviruses such as the ononis yellow mosaic tymovirus encode only three proteins. Of these two are overlapping this protein overlaps a larger ORF that is thought to be the polymerase
FGSG_11507	2097	74	3.14	12	0.53	0.668305	0.101673	-2.71657	hypothetical protein				gnl|CDD|65604 pfam01822, WSC, WSC domain. This domain may be involved in carbohydrate binding
FGSG_11534	888	2	0.12	1	0.06	0.0426539	0.0200083	-1.09208	hypothetical protein				gnl|CDD|70199 pfam06719, AraC_N, AraC-type transcriptional regulator N-terminus. This family represents the N-terminus of bacterial ARAC-type transcriptional regulators. In E. coli, these regulate the L-arabinose operon through sensing the presence of arabinose, and when the sugar is present, transmitting this information from the arabinose-binding domains to the protein's DNA-binding domains. Th…
FGSG_11545	1989	203	9.75	88	4.19	1.93287	0.786087	-1.29798	hypothetical protein				gnl|CDD|66051 pfam02326, YMF19, Plant ATP synthase F0. This family corresponds to subunit 8 (YMF19) of the F0 complex of plant and algae mitochondrial F-ATPases (EC:3.6.1.34)
FGSG_11549	858	20	1.94	2	0.18	0.441453	0.0414158	-3.41401	hypothetical protein				gnl|CDD|31231 COG1028, FabG, Dehydrogenases with different specificities (related to short-chain alcohol dehydrogenases) [Secondary metabolites biosynthesis, transport, and catabolism / General function prediction only]
FGSG_11551	1956	272	13.3	120	5.93	2.63355	1.09002	-1.27265	hypothetical protein	TF			gnl|CDD|67688 pfam04082, Fungal_trans, Fungal specific transcription factor domain
FGSG_11564	411	2756	612.54	383	85.82	126.993	16.5569	-2.93924	hypothetical protein				gnl|CDD|65768 pfam02009, Rifin_STEVOR, Rifin/stevor family. Several multicopy gene families have been described in Plasmodium falciparum, including the stevor family of subtelomeric open reading frames and the rif interspersed repetitive elements. Both families contain three predicted transmembrane segments. It has been proposed that stevor and rif are members of a larger superfamily that code fo…
FGSG_11573	2220	143	6.26	73	3.19	1.2199	0.584242	-1.06213	hypothetical protein		overlapped		gnl|CDD|32399 COG2217, ZntA, Cation transport ATPase [Inorganic ion transport and metabolism]
FGSG_11761	357	10	2.2	4	1.1	0.530485	0.199074	-1.41401	hypothetical protein				NA
FGSG_11844	642	17	2.19	8	1.01	0.501482	0.2214	-1.17954	hypothetical protein				NA
FGSG_11875	531	87	14.36	37	6.26	3.10289	1.23803	-1.32557	hypothetical protein				NA
FGSG_11904	1095	953	82.99	461	40	16.4824	7.48014	-1.13979	hypothetical protein				gnl|CDD|64562 pfam00704, Glyco_hydro_18, Glycosyl hydrolases family 18
FGSG_11962	813	33	3.41	12	1.29	0.768714	0.262249	-1.55151	hypothetical protein		overlapped		NA
FGSG_12047	273	47	16.07	17	5.99	3.26044	1.10639	-1.5592	hypothetical protein		overlapped		gnl|CDD|70714 pfam07259, ProSAAS, ProSAAS precursor. This family consists of several mammalian proSAAS precursor proteins. ProSAAS mRNA is expressed primarily in brain and other neuroendocrine tissues (pituitary, adrenal, pancreas); within brain, the mRNA is broadly distributed among neurons. ProSAAS is thought to be an endogenous inhibitor of prohormone convertase 1 may function as a neuropeptid…
FGSG_12054	441	12	1.97	6	0.82	0.515328	0.241733	-1.09208	hypothetical protein				NA
FGSG_12076	1299	874	63.36	459	33.74	12.7422	6.27807	-1.02122	hypothetical protein		overlapped		gnl|CDD|68245 pfam04666, Glyco_transf_54, N-Acetylglucosaminyltransferase-IV (GnT-IV) conserved region. The complex-type of oligosaccharides are synthesised through elongation by glycosyltransferases after trimming of the precursor oligosaccharides transferred to proteins in the endoplasmic reticulum. N-Acetylglucosaminyltransferases (GnTs) take part in the formation of branches in the biosynthes…
FGSG_12109	549	142	24.23	68	11.73	4.89843	2.20069	-1.15436	hypothetical protein				gnl|CDD|68326 pfam04749, PLAC8, PLAC8 family. This family includes the Placenta-specific gene 8 protein
FGSG_12111	525	35	4.79	16	1.95	1.26255	0.541481	-1.22136	hypothetical protein				gnl|CDD|47649 smart00321, WSC, present in yeast cell wall integrity and stress response component proteins; Domain present in WSC proteins, polycystin and fungal exoglucanase
FGSG_12156	375	3	0.52	1	0.19	0.151507	0.0473796	-1.67704	hypothetical protein				gnl|CDD|66988 pfam03348, Serinc, Serine incorporator (Serinc). This is a family of eukaryotic membrane proteins which incorporate serine into membranes and facilitate the synthesis of the serine-derived lipids phosphatidylserine and sphingolipid. Members of this family contain 11 transmembrane domains and form intracellular complexes with key enzymes involved in serine and sphingolipid biosynthes…
FGSG_12162	384	4	0.69	1	0.18	0.197274	0.0462692	-2.09208	hypothetical protein				NA
FGSG_12165	319	7	1.44	1	0.28	0.415574	0.055697	-2.89943	hypothetical protein				NA
FGSG_12206	1407	408	28.55	139	9.64	5.49171	1.75527	-1.64556	hypothetical protein		overlapped		gnl|CDD|30924 COG0579, COG0579, Predicted dehydrogenase [General function prediction only]
FGSG_12209	147	6	2.61	2	0.98	0.772992	0.241733	-1.67704	hypothetical protein		overlapped		NA
FGSG_12214	291	21673	6837.68	3396	1077.35	1410.48	207.347	-2.76607	hypothetical protein			overlapped	gnl|CDD|28937 cd00055, EGF_Lam, Laminin-type epidermal growth factor-like domain; laminins are the major noncollagenous components of basement membranes that mediate cell adhesion, growth migration, and differentiation; the laminin-type epidermal growth factor-like module occurs in tandem arrays; the domain contains 4 disulfide bonds (loops a-d) the first three resemble epidermal growth factor (E…
FGSG_12223	300	8	2.13	2	0.45	0.505022	0.118449	-2.09208	hypothetical protein				gnl|CDD|31231 COG1028, FabG, Dehydrogenases with different specificities (related to short-chain alcohol dehydrogenases) [Secondary metabolites biosynthesis, transport, and catabolism / General function prediction only]
FGSG_12229	768	3	0.13	1	0.04	0.0739778	0.0231346	-1.67704	hypothetical protein				gnl|CDD|66806 pfam03154, Atrophin-1, Atrophin-1 family. Atrophin-1 is the protein product of the dentatorubral-pallidoluysian atrophy (DRPLA) gene. DRPLA OMIM:125370 is a progressive neurodegenerative disorder. It is caused by the expansion of a CAG repeat in the DRPLA gene on chromosome 12p. This results in an extended polyglutamine region in atrophin-1, that is thought to confer toxicity to the…
FGSG_12240	780	241	29.83	125	15.24	5.85145	2.84733	-1.03918	hypothetical protein		overlapped		gnl|CDD|66448 pfam02763, Diphtheria_C, Diphtheria toxin, C domain. N-terminal catalytic (C) domain - blocks protein synthesis by transfer of ADP-ribose from NAD to a diphthamide residue of EF-2
FGSG_12249	303	6	1.51	3	0.85	0.375016	0.175914	-1.09208	hypothetical protein				NA
FGSG_12262	312	52	15.69	27	7.99	3.15639	1.53756	-1.03763	hypothetical protein		overlapped		NA
FGSG_12265	300	6	1.66	2	0.52	0.378766	0.118449	-1.67704	hypothetical protein				NA
FGSG_12289	336	8	1.53	3	0.55	0.450912	0.158637	-1.50712	hypothetical protein				NA
FGSG_12313	573	6	0.72	2	0.32	0.198307	0.0620152	-1.67704	hypothetical protein				NA
FGSG_12325	444	184	38.61	71	14.78	7.84831	2.84118	-1.46589	hypothetical protein				gnl|CDD|72117 pfam08693, SKG6, Membrane protein SKG6. SKG6 is a novel membrane protein that shows polarised intracellular localisation
FGSG_12376	558	959	154.86	383	62.34	32.5481	12.1952	-1.41627	hypothetical protein			overlapped	gnl|CDD|70916 pfam07466, DUF1517, Protein of unknown function (DUF1517). This family consists of several hypothetical glycine rich plant and bacterial proteins of around 300 residues in length. The function of this family is unknown
FGSG_12401	300	26	7.26	10	2.9	1.64132	0.592245	-1.47059	hypothetical protein				gnl|CDD|65107 pfam01284, MARVEL, Membrane-associating domain. MARVEL domain-containing proteins are often found in lipid-associating proteins - such as Occludin and MAL family proteins. It may be part of the machinery of membrane apposition events, such as transport vesicle biogenesis
FGSG_12402	624	12	1.52	6	0.79	0.364198	0.17084	-1.09208	hypothetical protein				gnl|CDD|66998 pfam03358, FMN_red, NADPH-dependent FMN reductase
FGSG_12424	771	3598	448.27	1850	230.22	88.3788	42.6324	-1.05175	hypothetical protein				gnl|CDD|31695 COG1506, DAP2, Dipeptidyl aminopeptidases/acylaminoacyl-peptidases [Amino acid transport and metabolism]
FGSG_12432	432	103	21	41	7.85	4.51539	1.68625	-1.42103	hypothetical protein		overlapped		NA
FGSG_12439	1980	2636	128.89	394	18.95	25.2128	3.53552	-2.83416	hypothetical protein				gnl|CDD|68674 pfam05109, Herpes_BLLF1, Herpes virus major outer envelope glycoprotein (BLLF1). This family consists of the BLLF1 viral late glycoprotein, also termed gp350/220. It is the most abundantly expressed glycoprotein in the viral envelope of the Herpesviruses and is the major antigen responsible for stimulating the production of neutralising antibodies in vivo
FGSG_12455	315	13	2.72	2	0.47	0.781581	0.112809	-2.79252	hypothetical protein				NA
FGSG_12621	777	2	0.13	1	0.07	0.0487473	0.0228666	-1.09208	hypothetical protein				gnl|CDD|29261 cd00204, ANK, ankyrin repeats; ankyrin repeats mediate protein-protein interactions in very diverse families of proteins. The number of ANK repeats in a protein can range from 2 to over 20 (ankyrins, for example). ANK repeats may occur in combinations with other types of domains. The structural repeat unit contains two antiparallel helices and a beta-hairpin, repeats are stacked in …
FGSG_12626	1191	16	0.95	8	0.56	0.254419	0.119344	-1.09208	hypothetical protein				gnl|CDD|31010 COG0666, Arp, FOG: Ankyrin repeat [General function prediction only]
FGSG_12629	363	2	0.17	1	0.09	0.104343	0.0489459	-1.09208	hypothetical protein				gnl|CDD|29541 cd02181, GH16_MLG1_glucanase, The MLG1-like glucanses are a group of fungal beta-1,3-glucanases that are active on 1,3 beta-glucans as well as mixed-linked beta-glucans. MLG1 belongs to a family of glycosyl hydrolases that includes lichenase, xyloglucan endotransglycosylase (XET), beta-agarase, kappa-carrageenase, endo-beta-1,3-glucanase, endo-beta-1,3-1,4-glucanase, and endo-beta-g…
FGSG_12651	390	1037	248.86	437	103.42	50.3565	19.9086	-1.33879	hypothetical protein				gnl|CDD|32155 COG1972, NupC, Nucleoside permease [Nucleotide transport and metabolism]
FGSG_12783	480	44	7.58	17	2.99	1.73601	0.629261	-1.46405	hypothetical protein				gnl|CDD|66617 pfam02956, TT_ORF1, TT viral orf 1. TT virus (TTV), isolated initially from a Japanese patient with hepatitis of unknown aetiology, has since been found to infect both healthy and diseased individuals and numerous prevalence studies have raised questions about its role in unexplained hepatitis. ORF1 is a large 750 residue protein
FGSG_12820	447	324	67.38	92	19.49	13.7271	3.65682	-1.90837	member of PKS5 cluster (TFC52)				gnl|CDD|68202 pfam04621, ETS_PEA3_N, PEA3 subfamily ETS-domain transcription factor N terminal domain. The N terminus of the PEA3 transcription factors is implicated in transactivation and in inhibition of DNA binding. Transactivation is potentiated by activation of the Ras/MAP kinase and protein kinase A signalling cascades. The N terminal region contains conserved MAP kinase phosphorylation sit…
FGSG_12823	342	10	2.46	2	0.55	0.553752	0.103903	-2.41401	member of PKS5 cluster (TFC52)				NA
FGSG_12837	783	50	5.88	18	2.09	1.20934	0.408445	-1.56601	member of PKS5 cluster (TFC52)				NA
FGSG_12910	1167	128	9.74	61	4.52	2.07721	0.928714	-1.16134	hypothetical protein				NA
FGSG_12912	399	8	1.49	4	0.69	0.379716	0.178119	-1.09208	hypothetical protein				gnl|CDD|69530 pfam06011, TRP, Transient receptor potential (TRP) ion channel. This family of proteins are transient receptor potential (TRP) ion channels. They are essential for cellular viability and are involved in cell growth and cell wall synthesis. The genes for these proteins are homologous to polycystic kidney disease related ion channel genes
FGSG_12936	348	14	2.95	4	0.89	0.761886	0.204223	-1.89943	hypothetical protein				NA
FGSG_12993	411	13	2.26	3	0.53	0.599022	0.129689	-2.20756	hypothetical protein			overlapped	gnl|CDD|66463 pfam02779, Transket_pyr, Transketolase, pyrimidine binding domain. This family includes transketolase enzymes, pyruvate dehydrogenases, and branched chain alpha-keto acid decarboxylases
FGSG_13043	369	13	2.88	4	0.68	0.667203	0.1926	-1.79252	hypothetical protein				NA
FGSG_13077	306	29	8.91	14	4.24	1.79481	0.812886	-1.1427	hypothetical protein				NA
FGSG_13104	306	5	1.08	1	0.29	0.30945	0.0580633	-2.41401	hypothetical protein				NA
FGSG_13135	879	18	1.74	5	0.47	0.387815	0.101066	-1.94008	hypothetical protein	TF			gnl|CDD|67688 pfam04082, Fungal_trans, Fungal specific transcription factor domain
FGSG_13144	330	6	1.29	3	0.62	0.344333	0.161521	-1.09208	hypothetical protein				NA
FGSG_13145	1107	164	14.37	81	7.12	2.80568	1.30005	-1.10978	hypothetical protein				gnl|CDD|30597 COG0248, GppA, Exopolyphosphatase [Nucleotide transport and metabolism / Inorganic ion transport and metabolism]
FGSG_13222	1260	5669	441.28	82	6.46	85.2074	1.15629	-6.20341	hypothetical protein				gnl|CDD|31695 COG1506, DAP2, Dipeptidyl aminopeptidases/acylaminoacyl-peptidases [Amino acid transport and metabolism]
FGSG_13223	663	4220	612.56	25	3.7	120.543	0.669961	-7.49125	hypothetical protein				gnl|CDD|48108 cd03181, GST_C_EFB1gamma, GST_C family, Gamma subunit of Elongation Factor 1B (EFB1gamma) subfamily; EF1Bgamma is part of the eukaryotic translation elongation factor-1 (EF1) complex which plays a central role in the elongation cycle during protein biosynthesis. EF1 consists of two functionally distinct units, EF1A and EF1B. EF1A catalyzes the GTP-dependent binding of aminoacyl-tRNA…
FGSG_13237	378	44	10.58	14	3.19	2.20446	0.65805	-1.74416	hypothetical protein				gnl|CDD|70402 pfam06933, SSP160, Special lobe-specific silk protein SSP160. This family consists of several special lobe-specific silk protein SSP160 sequences which appear to be specific to Chironomus (Midge) species
FGSG_13372	363	25	5.51	13	3.07	1.30429	0.636297	-1.0355	hypothetical protein				NA
FGSG_13376	360	14	2.07	5	0.75	0.73649	0.246769	-1.57751	hypothetical protein				NA
FGSG_13392	105	2125	1459.01	919	628.64	383.275	155.507	-1.3014	hypothetical protein				NA
FGSG_13402	714	2	0.22	1	0.14	0.0530485	0.0248843	-1.09208	hypothetical protein				NA
FGSG_13420	2136	13	0.43	3	0.09	0.115261	0.0249542	-2.20756	hypothetical protein		overlapped		gnl|CDD|31767 COG1579, COG1579, Zn-ribbon protein, possibly nucleic acid-binding [General function prediction only]
FGSG_13445	1524	10	0.5	5	0.27	0.124267	0.0582919	-1.09208	member of butenolide gene cluster				gnl|CDD|63955 pfam00067, p450, Cytochrome P450. Cytochrome P450s are haem-thiolate proteins involved in the oxidative degradation of various compounds. They are particularly well known for their role in the degradation of environmental toxins and mutagens. They can be divided into 4 classes, according to the method by which electrons from NAD(P)H are delivered to the catalytic site. Sequence cons…
FGSG_13453	456	5	0.65	2	0.27	0.207657	0.077927	-1.41401	hypothetical protein				NA
FGSG_13462	540	22	3.49	10	1.69	0.771561	0.329025	-1.22958	hypothetical protein			overlapped	NA
FGSG_13464	273	106	36.51	31	10.05	7.35334	2.01754	-1.8658	hypothetical protein				NA
FGSG_13511	333	4	0.91	2	0.48	0.227487	0.106711	-1.09208	hypothetical protein				gnl|CDD|34366 COG4752, COG4752, Uncharacterized protein conserved in bacteria [Function unknown]
FGSG_13515	369	831	187.84	233	52.75	42.6497	11.219	-1.9266	hypothetical protein				gnl|CDD|64017 pfam00131, Metallothio, Metallothionein
FGSG_13554	432	13	1.77	6	0.98	0.569903	0.246769	-1.20756	hypothetical protein				NA
FGSG_13600	387	6	1.19	2	0.45	0.293617	0.091821	-1.67704	hypothetical protein				NA
FGSG_13643	471	5	0.63	2	0.17	0.201044	0.0754453	-1.41401	hypothetical protein				NA
FGSG_13718	438	173	31.71	91	17.03	7.4802	3.69139	-1.01891	hypothetical protein				gnl|CDD|34761 COG5160, ULP1, Protease, Ulp1 family [Posttranslational modification, protein turnover, chaperones]
FGSG_13743	1632	11	0.55	4	0.19	0.127648	0.0435474	-1.55151	hypothetical protein				NA
FGSG_13749	357	16	3.9	7	1.64	0.848776	0.34838	-1.28472	hypothetical protein				NA
FGSG_13771	315	28	8.12	8	2.18	1.68341	0.451235	-1.89943	hypothetical protein				NA
FGSG_13796	1335	109	7.87	21	1.49	1.54627	0.279487	-2.46795	member of TFC25		overlapped		gnl|CDD|63955 pfam00067, p450, Cytochrome P450. Cytochrome P450s are haem-thiolate proteins involved in the oxidative degradation of various compounds. They are particularly well known for their role in the degradation of environmental toxins and mutagens. They can be divided into 4 classes, according to the method by which electrons from NAD(P)H are delivered to the catalytic site. Sequence cons…
FGSG_13797	1323	361	26.42	101	7.43	5.1676	1.35639	-1.92972	member of TFC25		overlapped		gnl|CDD|63955 pfam00067, p450, Cytochrome P450. Cytochrome P450s are haem-thiolate proteins involved in the oxidative degradation of various compounds. They are particularly well known for their role in the degradation of environmental toxins and mutagens. They can be divided into 4 classes, according to the method by which electrons from NAD(P)H are delivered to the catalytic site. Sequence cons…
FGSG_13869	243	480	181.06	235	90.07	37.409	17.1824	-1.12245	hypothetical protein				NA
FGSG_13904	666	16	1.97	6	0.74	0.454975	0.160066	-1.50712	hypothetical protein				gnl|CDD|67521 pfam03910, Adeno_PV, Adenovirus minor core protein PV
FGSG_13921	327	2	0.43	1	0.27	0.115831	0.0543344	-1.09208	hypothetical protein				NA
FGSG_13925	738	14	1.83	6	0.82	0.359263	0.14445	-1.31447	hypothetical protein		overlapped		gnl|CDD|72734 pfam09319, DUF1976, Domain of unknown function (DUF1976). Members of this family are found in a set of hypothetical Mycoplasmal proteins. Their exact function has not, as yet, been defined
FGSG_13941	324	15	3.44	6	1.6	0.876774	0.329025	-1.41401	hypothetical protein			overlapped	NA
FGSG_13943	1044	24	2.11	12	1.06	0.435364	0.204223	-1.09208	hypothetical protein			overlapped	gnl|CDD|30861 COG0515, SPS1, Serine/threonine protein kinase [General function prediction only / Signal transduction mechanisms / Transcription / DNA replication, recombination, and repair]
FGSG_13952	318	22	6.19	1	0.32	1.3102	0.0558722	-4.55151	hypothetical protein				gnl|CDD|70423 pfam06954, Resistin, Resistin. This family consists of several mammalian resistin proteins. Resistin is a 12.5-kDa cysteine-rich secreted polypeptide first reported from rodent adipocytes. It belongs to a multigene family termed RELMs or FIZZ proteins. Plasma resistin levels are significantly increased in both genetically susceptible and high-fat-diet-induced obese mice. Immunoneutr…
FGSG_13955	1308	5	0.22	2	0.09	0.0723942	0.0271672	-1.41401	hypothetical protein				gnl|CDD|69062 pfam05518, Totivirus_coat, Totivirus coat protein
FGSG_13961	642	193	29.11	94	14.22	5.69329	2.60145	-1.12995	hypothetical protein				gnl|CDD|63957 pfam00069, Pkinase, Protein kinase domain
FGSG_13997	306	7	1.87	3	0.82	0.433229	0.17419	-1.31447	hypothetical protein		overlapped		NA
FGSG_14025	744	14	1.47	2	0.27	0.356366	0.0477617	-2.89943	hypothetical protein				gnl|CDD|47771 smart00465, GIYc, GIY-YIG type nucleases (URI domain);
aFLTRI6 strain; bFLTRI6DFgLaeA strain; ctranscription factor; ddifferentially expressed genes; econserved domain databases; ftentative functional gene cluster according to the previous study [40]. Genes beloning to the TFC were inidcated by yellow color.
